# Supplementary material for: Disparate temperature-dependent virus–host dynamics for SARS-CoV-2 and SARS-CoV in the human respiratory epithelium
Source: PLoS Biol. 2021 Mar 29;19(3):e3001158. doi: 10.1371/journal.pbio.3001158 (PMC8032198; doi:10.1371/journal.pbio.3001158)
Supplement: S1 Data — (XLSX) [file pbio.3001158.s013.xlsx]

## Sheet: Figs 1a and 1b
hpi	temperature	virus	donor	replicate	titer
0	33	mock	in_1	1	1
0	33	SARS	in_1	1	80000
0	33	SARS-2	in_1	1	40000
0	33	mock	in_1	2	1
0	33	SARS	in_1	2	200000
0	33	SARS-2	in_1	2	68000
0	37	mock	in_1	1	1
0	37	SARS	in_1	1	80000
0	37	SARS-2	in_1	1	40000
0	37	mock	in_1	2	1
0	37	SARS	in_1	2	200000
0	37	SARS-2	in_1	2	68000
1	33	mock	1	1	1
1	33	mock	1	2	1
1	33	SARS	1	1	1
1	33	SARS	1	2	80
1	33	SARS-2	1	1	1
1	33	SARS-2	1	2	80
1	37	mock	1	1	40
1	37	mock	1	2	1
1	37	SARS	1	1	800
1	37	SARS	1	2	1200
1	37	SARS-2	1	1	400
1	37	SARS-2	1	2	200
24	33	mock	1	1	1
24	33	mock	1	2	1
24	33	SARS	1	1	1
24	33	SARS	1	2	880
24	33	SARS-2	1	1	200
24	33	SARS-2	1	2	200
24	37	mock	1	1	1
24	37	mock	1	2	1
24	37	SARS	1	1	240
24	37	SARS	1	2	40
24	37	SARS-2	1	1	160
24	37	SARS-2	1	2	400
48	33	mock	1	1	1
48	33	mock	1	2	1
48	33	SARS	1	1	40
48	33	SARS	1	2	120
48	33	SARS-2	1	1	800
48	33	SARS-2	1	2	3600
48	37	mock	1	1	1
48	37	mock	1	2	1
48	37	SARS	1	1	1200
48	37	SARS	1	2	8000
48	37	SARS-2	1	1	4400
48	37	SARS-2	1	2	4000
72	33	mock	1	1	1
72	33	mock	1	2	1
72	33	SARS	1	1	120
72	33	SARS	1	2	800
72	33	SARS-2	1	1	8000
72	33	SARS-2	1	2	120000
72	37	mock	1	1	1
72	37	mock	1	2	1
72	37	SARS	1	1	4000
72	37	SARS	1	2	28000
72	37	SARS-2	1	1	4000
72	37	SARS-2	1	2	4000
96	33	mock	1	1	1
96	33	mock	1	2	1
96	33	SARS	1	1	80
96	33	SARS	1	2	24000
96	33	SARS-2	1	1	120000
96	33	SARS-2	1	2	160000
96	37	mock	1	1	1
96	37	mock	1	2	1
96	37	SARS	1	1	20000
96	37	SARS	1	2	40000
96	37	SARS-2	1	1	800
96	37	SARS-2	1	2	1200
1	33	mock	2	1	1
1	33	mock	2	2	1
1	33	SARS	2	1	40
1	33	SARS	2	2	80
1	33	SARS-2	2	1	160
1	33	SARS-2	2	2	1
1	37	mock	2	1	40
1	37	mock	2	2	1
1	37	SARS	2	1	800
1	37	SARS	2	2	1200
1	37	SARS-2	2	1	280
1	37	SARS-2	2	2	400
24	33	mock	2	1	1
24	33	mock	2	2	1
24	33	SARS	2	1	1
24	33	SARS	2	2	160
24	33	SARS-2	2	1	40
24	33	SARS-2	2	2	1
24	37	mock	2	1	1
24	37	mock	2	2	80
24	37	SARS	2	1	1
24	37	SARS	2	2	160
24	37	SARS-2	2	1	1
24	37	SARS-2	2	2	80
48	33	mock	2	1	1
48	33	mock	2	2	1
48	33	SARS	2	1	80
48	33	SARS	2	2	1200
48	33	SARS-2	2	1	400
48	33	SARS-2	2	2	400
48	37	mock	2	1	1
48	37	mock	2	2	1
48	37	SARS	2	1	800
48	37	SARS	2	2	80
48	37	SARS-2	2	1	200
48	37	SARS-2	2	2	80
72	33	mock	2	1	1
72	33	mock	2	2	1
72	33	SARS	2	1	200
72	33	SARS	2	2	400
72	33	SARS-2	2	1	16000
72	33	SARS-2	2	2	8000
72	37	mock	2	1	1
72	37	mock	2	2	1
72	37	SARS	2	1	200
72	37	SARS	2	2	1600
72	37	SARS-2	2	1	160
72	37	SARS-2	2	2	1200
96	33	mock	2	1	1
96	33	mock	2	2	1
96	33	SARS	2	1	1
96	33	SARS	2	2	800
96	33	SARS-2	2	1	40000
96	33	SARS-2	2	2	80000
96	37	mock	2	1	1
96	37	mock	2	2	1
96	37	SARS	2	1	1600
96	37	SARS	2	2	8000
96	37	SARS-2	2	1	1200
96	37	SARS-2	2	2	400
1	33	mock	3	1	1
1	33	mock	3	2	1
1	33	SARS	3	1	160
1	33	SARS	3	2	80
1	33	SARS-2	3	1	360
1	33	SARS-2	3	2	1
1	37	mock	3	1	1
1	37	mock	3	2	1
1	37	SARS	3	1	400
1	37	SARS	3	2	400
1	37	SARS-2	3	1	120
1	37	SARS-2	3	2	400
24	33	mock	3	1	1
24	33	mock	3	2	1
24	33	SARS	3	1	1
24	33	SARS	3	2	1
24	33	SARS-2	3	1	400
24	33	SARS-2	3	2	400
24	37	mock	3	1	1
24	37	mock	3	2	1
24	37	SARS	3	1	80
24	37	SARS	3	2	1
24	37	SARS-2	3	1	1200
24	37	SARS-2	3	2	320
48	33	mock	3	1	1
48	33	mock	3	2	1
48	33	SARS	3	1	160
48	33	SARS	3	2	1200
48	33	SARS-2	3	1	2800
48	33	SARS-2	3	2	8000
48	37	mock	3	1	1
48	37	mock	3	2	1
48	37	SARS	3	1	1
48	37	SARS	3	2	1
48	37	SARS-2	3	1	4400
48	37	SARS-2	3	2	1200
72	33	mock	3	1	1
72	33	mock	3	2	1
72	33	SARS	3	1	280
72	33	SARS	3	2	400
72	33	SARS-2	3	1	40000
72	33	SARS-2	3	2	160000
72	37	mock	3	1	1
72	37	mock	3	2	1
72	37	SARS	3	1	40
72	37	SARS	3	2	1
72	37	SARS-2	3	1	2000
72	37	SARS-2	3	2	1200
96	33	mock	3	1	1
96	33	mock	3	2	1
96	33	SARS	3	1	1520
96	33	SARS	3	2	1200
96	33	SARS-2	3	1	12000
96	33	SARS-2	3	2	40000
96	37	mock	3	1	1
96	37	mock	3	2	1
96	37	SARS	3	1	1
96	37	SARS	3	2	400
96	37	SARS-2	3	1	440
96	37	SARS-2	3	2	800
0	37	mock	in_2	1	1
0	37	SARS	in_2	1	1000000
0	37	SARS-2	in_2	1	120000
0	37	mock	in_2	2	1
0	37	SARS	in_2	2	1000000
0	37	SARS-2	in_2	2	84000
0	33	mock	in_2	1	1
0	33	SARS	in_2	1	1000000
0	33	SARS-2	in_2	1	120000
0	33	mock	in_2	2	1
0	33	SARS	in_2	2	1000000
0	33	SARS-2	in_2	2	84000
1	37	mock	4	1	1
1	33	mock	4	1	1
1	37	mock	4	2	40
1	33	mock	4	2	1
1	37	SARS	4	1	1200
1	33	SARS	4	1	800
1	37	SARS	4	2	200
1	33	SARS	4	2	520
1	37	SARS-2	4	1	80
1	33	SARS-2	4	1	40
1	37	SARS-2	4	2	160
1	33	SARS-2	4	2	120
24	37	mock	4	1	1
24	33	mock	4	1	1
24	37	mock	4	2	1
24	33	mock	4	2	1
24	37	SARS	4	1	400
24	33	SARS	4	1	720
24	37	SARS	4	2	120
24	33	SARS	4	2	400
24	37	SARS-2	4	1	40
24	33	SARS-2	4	1	40
24	37	SARS-2	4	2	80
24	33	SARS-2	4	2	1
48	37	mock	4	1	1
48	33	mock	4	1	1
48	37	mock	4	2	1
48	33	mock	4	2	1
48	37	SARS	4	1	3200
48	33	SARS	4	1	3200
48	37	SARS	4	2	240
48	33	SARS	4	2	3200
48	37	SARS-2	4	1	4000
48	33	SARS-2	4	1	2800
48	37	SARS-2	4	2	1120
48	33	SARS-2	4	2	840
72	37	mock	4	1	1
72	33	mock	4	1	1
72	37	mock	4	2	1
72	33	mock	4	2	1
72	37	SARS	4	1	60000
72	33	SARS	4	1	16000
72	37	SARS	4	2	6000
72	33	SARS	4	2	12000
72	37	SARS-2	4	1	64000
72	33	SARS-2	4	1	72000
72	37	SARS-2	4	2	32000
72	33	SARS-2	4	2	60000
96	37	mock	4	1	1
96	33	mock	4	1	1
96	37	mock	4	2	1
96	33	mock	4	2	1
96	37	SARS	4	1	84000
96	33	SARS	4	1	80000
96	37	SARS	4	2	40000
96	33	SARS	4	2	20000
96	37	SARS-2	4	1	148000
96	33	SARS-2	4	1	228000
96	37	SARS-2	4	2	76000
96	33	SARS-2	4	2	360000
1	37	mock	5	1	1
1	33	mock	5	1	1
1	37	mock	5	2	1
1	33	mock	5	2	40
1	37	SARS	5	1	800
1	33	SARS	5	1	920
1	37	SARS	5	2	760
1	33	SARS	5	2	600
1	37	SARS-2	5	1	1
1	33	SARS-2	5	1	160
1	37	SARS-2	5	2	1
1	33	SARS-2	5	2	120
24	37	mock	5	1	1
24	33	mock	5	1	1
24	37	mock	5	2	1
24	33	mock	5	2	40
24	37	SARS	5	1	1
24	33	SARS	5	1	120
24	37	SARS	5	2	40
24	33	SARS	5	2	240
24	37	SARS-2	5	1	40
24	33	SARS-2	5	1	80
24	37	SARS-2	5	2	1
24	33	SARS-2	5	2	80
48	37	mock	5	1	1
48	33	mock	5	1	1
48	37	mock	5	2	1
48	33	mock	5	2	1
48	37	SARS	5	1	1
48	33	SARS	5	1	440
48	37	SARS	5	2	520
48	33	SARS	5	2	880
48	37	SARS-2	5	1	160
48	33	SARS-2	5	1	1200
48	37	SARS-2	5	2	240
48	33	SARS-2	5	2	640
72	37	mock	5	1	1
72	33	mock	5	1	1
72	37	mock	5	2	1
72	33	mock	5	2	1
72	37	SARS	5	1	1
72	33	SARS	5	1	560
72	37	SARS	5	2	400
72	33	SARS	5	2	600
72	37	SARS-2	5	1	2400
72	33	SARS-2	5	1	32000
72	37	SARS-2	5	2	800
72	33	SARS-2	5	2	6400
96	37	mock	5	1	1
96	33	mock	5	1	1
96	37	mock	5	2	1
96	33	mock	5	2	1
96	37	SARS	5	1	1
96	33	SARS	5	1	800
96	37	SARS	5	2	3600
96	33	SARS	5	2	400
96	37	SARS-2	5	1	3600
96	33	SARS-2	5	1	104000
96	37	SARS-2	5	2	6400
96	33	SARS-2	5	2	68000
1	37	mock	6	1	1
1	33	mock	6	1	1
1	37	mock	6	2	1
1	33	mock	6	2	1
1	37	SARS	6	1	800
1	33	SARS	6	1	800
1	37	SARS	6	2	520
1	33	SARS	6	2	3200
1	37	SARS-2	6	1	1
1	33	SARS-2	6	1	400
1	37	SARS-2	6	2	1
1	33	SARS-2	6	2	80
24	37	mock	6	1	1
24	33	mock	6	1	1
24	37	mock	6	2	1
24	33	mock	6	2	1
24	37	SARS	6	1	120
24	33	SARS	6	1	80
24	37	SARS	6	2	80
24	33	SARS	6	2	320
24	37	SARS-2	6	1	1
24	33	SARS-2	6	1	200
24	37	SARS-2	6	2	1
24	33	SARS-2	6	2	1
48	37	mock	6	1	1
48	33	mock	6	1	1
48	37	mock	6	2	1
48	33	mock	6	2	1
48	37	SARS	6	1	720
48	33	SARS	6	1	320
48	37	SARS	6	2	680
48	33	SARS	6	2	3200
48	37	SARS-2	6	1	1
48	33	SARS-2	6	1	4000
48	37	SARS-2	6	2	1120
48	33	SARS-2	6	2	1000
72	37	mock	6	1	1
72	33	mock	6	1	1
72	37	mock	6	2	1
72	33	mock	6	2	1
72	37	SARS	6	1	6800
72	33	SARS	6	1	1600
72	37	SARS	6	2	14800
72	33	SARS	6	2	6800
72	37	SARS-2	6	1	1440
72	33	SARS-2	6	1	100000
72	37	SARS-2	6	2	16400
72	33	SARS-2	6	2	48000
96	37	mock	6	1	1
96	33	mock	6	1	1
96	37	mock	6	2	1
96	33	mock	6	2	1
96	37	SARS	6	1	64000
96	33	SARS	6	1	4800
96	37	SARS	6	2	64000
96	33	SARS	6	2	7200
96	37	SARS-2	6	1	10800
96	33	SARS-2	6	1	600000
96	37	SARS-2	6	2	20000
96	33	SARS-2	6	2	240000
1	37	mock	7	1	1
1	33	mock	7	1	1
1	37	mock	7	2	1
1	33	mock	7	2	1
1	37	SARS	7	1	360
1	33	SARS	7	1	200
1	37	SARS	7	2	520
1	33	SARS	7	2	560
1	37	SARS-2	7	1	80
1	33	SARS-2	7	1	80
1	37	SARS-2	7	2	160
1	33	SARS-2	7	2	120
24	37	mock	7	1	1
24	33	mock	7	1	1
24	37	mock	7	2	1
24	33	mock	7	2	1
24	37	SARS	7	1	120
24	33	SARS	7	1	160
24	37	SARS	7	2	80
24	33	SARS	7	2	1
24	37	SARS-2	7	1	1
24	33	SARS-2	7	1	40
24	37	SARS-2	7	2	1
24	33	SARS-2	7	2	1
48	37	mock	7	1	1
48	33	mock	7	1	1
48	37	mock	7	2	1
48	33	mock	7	2	1
48	37	SARS	7	1	800
48	33	SARS	7	1	1
48	37	SARS	7	2	400
48	33	SARS	7	2	640
48	37	SARS-2	7	1	1
48	33	SARS-2	7	1	760
48	37	SARS-2	7	2	560
48	33	SARS-2	7	2	1
72	37	mock	7	1	1
72	33	mock	7	1	1
72	37	mock	7	2	1
72	33	mock	7	2	1
72	37	SARS	7	1	4800
72	33	SARS	7	1	40
72	37	SARS	7	2	3600
72	33	SARS	7	2	3600
72	37	SARS-2	7	1	1
72	33	SARS-2	7	1	56000
72	37	SARS-2	7	2	20400
72	33	SARS-2	7	2	3200
96	37	mock	7	1	1
96	33	mock	7	1	1
96	37	mock	7	2	1
96	33	mock	7	2	1
96	37	SARS	7	1	32000
96	33	SARS	7	1	240
96	37	SARS	7	2	24000
96	33	SARS	7	2	44000
96	37	SARS-2	7	1	1
96	33	SARS-2	7	1	180000
96	37	SARS-2	7	2	40000
96	33	SARS-2	7	2	44000

## Sheet: Fig 1d
cell	donor	virus	temperature	image	Mean	Median
0	1	SARS	33	184	297905	296
1	1	SARS	33	184	306972	304
2	1	SARS	33	184	325676	324
3	1	SARS	33	184	309753	310
4	1	SARS	33	184	290933	289
5	1	SARS	33	184	299549	298
6	1	SARS	33	184	329921	332
7	1	SARS	33	184	303853	303
8	1	SARS	33	184	30889	308
9	1	SARS	33	184	294165	294
10	1	SARS	33	184	323145	322
11	1	SARS	33	184	310465	309
12	1	SARS	33	184	313921	312
13	1	SARS	33	184	302162	302
14	1	SARS	33	184	305955	303
15	1	SARS	33	184	317643	317
16	1	SARS	33	184	307	307
17	1	SARS	33	184	326225	326
18	1	SARS	33	184	349972	349
19	1	SARS	33	184	300921	299
20	1	SARS	33	184	315332	312
21	1	SARS	33	184	309433	309
22	1	SARS	33	184	30433	304
23	1	SARS	33	184	321837	321
24	1	SARS	33	184	308471	307
25	1	SARS	33	184	305979	304
26	1	SARS	33	184	309656	309
27	1	SARS	33	184	307028	306
28	1	SARS	33	184	29636	296
29	1	SARS	33	184	306163	304
30	1	SARS	33	184	299777	298
31	1	SARS	33	184	313196	312
32	1	SARS	33	184	303115	302
33	1	SARS	33	184	299697	298
34	1	SARS	33	184	307794	306
35	1	SARS	33	184	29505	294
36	1	SARS	33	184	311777	309
37	1	SARS	33	184	309309	308
38	1	SARS	33	184	312634	310
39	1	SARS	33	184	309042	307
40	1	SARS	33	184	305428	304
41	1	SARS	33	184	305584	303
42	1	SARS	33	184	319765	319
43	1	SARS	33	184	306835	306
44	1	SARS	33	184	311339	311
45	1	SARS	33	184	314428	313
46	1	SARS	33	184	299584	298
47	1	SARS	33	184	298785	298
48	1	SARS	33	184	319073	319
49	1	SARS	33	184	313516	312
50	1	SARS	33	184	305083	305
51	1	SARS	33	184	319011	317
52	1	SARS	33	184	310356	308
53	1	SARS	33	184	332629	331
54	1	SARS	33	184	306661	305
55	1	SARS	33	184	330957	331
56	1	SARS	33	184	307266	306
57	1	SARS	33	184	332121	331
58	1	SARS	33	184	320001	320
59	1	SARS	33	184	304633	304
60	1	SARS	33	184	293841	293
61	1	SARS	33	184	32087	320
62	1	SARS	33	184	304625	303
63	1	SARS	33	184	324188	323
64	1	SARS	33	184	329355	329
65	1	SARS	33	184	313243	312
66	1	SARS	33	184	316667	315
67	1	SARS	33	184	306781	305
68	1	SARS	33	184	311128	311
69	1	SARS	33	184	324543	325
70	1	SARS	33	184	312873	312
71	1	SARS	33	184	313084	312
72	1	SARS	33	184	314462	314
73	1	SARS	33	184	322405	321
74	1	SARS	33	184	315768	314
75	1	SARS	33	184	314376	312
76	1	SARS	33	184	301919	301
77	1	SARS	33	184	304687	304
78	1	SARS	33	184	306695	306
79	1	SARS	33	184	314176	314
80	1	SARS	33	184	314563	313
81	1	SARS	33	184	311763	311
82	1	SARS	33	184	332357	331
83	1	SARS	33	184	309696	309
84	1	SARS	33	184	312267	310
85	1	SARS	33	184	30064	300
86	1	SARS	33	184	316048	314
87	1	SARS	33	184	306295	305
88	1	SARS	33	184	311091	311
89	1	SARS	33	184	299923	299
90	1	SARS	33	184	337114	335
91	1	SARS	33	184	349701	347
92	1	SARS	33	184	32133	320
93	1	SARS	33	184	315929	315
94	1	SARS	33	184	316769	316
95	1	SARS	33	184	317732	316
96	1	SARS	33	184	310	310
97	1	SARS	33	184	304932	301
98	1	SARS	33	184	32035	321
99	1	SARS	33	184	292372	292
100	1	SARS	33	184	318329	318
101	1	SARS	33	184	326391	326
102	1	SARS	33	184	321199	320
103	1	SARS	33	184	305125	303
104	1	SARS	33	184	326119	326
105	1	SARS	33	184	31876	317
106	1	SARS	33	184	319077	319
107	1	SARS	33	184	309366	306
108	1	SARS	33	184	325558	322
109	1	SARS	33	184	307889	306
110	1	SARS	33	184	317416	317
111	1	SARS	33	184	326169	323
112	1	SARS	33	184	306491	306
113	1	SARS	33	184	308959	309
114	1	SARS	33	184	345649	342
115	1	SARS	33	184	308503	308
116	1	SARS	33	184	299223	298
117	1	SARS	33	184	313332	312
118	1	SARS	33	184	309145	310
119	1	SARS	33	184	303094	303
120	1	SARS	33	184	302922	302
121	1	SARS	33	184	316379	315
122	1	SARS	33	184	306777	305
123	1	SARS	33	184	314071	314
124	1	SARS	33	184	30805	306
125	1	SARS	33	184	331648	329
126	1	SARS	33	184	327915	327
127	1	SARS	33	184	295404	295
128	1	SARS	33	184	292269	291
129	1	SARS	33	184	320312	321
130	1	SARS	33	184	325825	322
131	1	SARS	33	184	307449	306
132	1	SARS	33	184	326394	326
133	1	SARS	33	184	317157	317
134	1	SARS	33	184	304216	304
135	1	SARS	33	184	32094	321
136	1	SARS	33	184	298811	299
137	1	SARS	33	184	297781	298
138	1	SARS	33	184	319472	318
139	1	SARS	33	184	339201	338
140	1	SARS	33	184	320999	318
141	1	SARS	33	184	320991	320
142	1	SARS	33	184	338987	340
143	1	SARS	33	184	305686	305
144	1	SARS	33	184	319184	319
145	1	SARS	33	184	308019	308
146	1	SARS	33	184	320628	318
147	1	SARS	33	184	308986	308
148	1	SARS	33	184	319542	318
149	1	SARS	33	184	305987	304
150	1	SARS	33	184	317395	316
151	1	SARS	33	184	295125	295
152	1	SARS	33	184	306548	305
153	1	SARS	33	184	31027	308
154	1	SARS	33	184	304672	304
155	1	SARS	33	184	313846	312
156	1	SARS	33	184	322715	322
157	1	SARS	33	184	312802	311
158	1	SARS	33	184	304075	302
159	1	SARS	33	184	323034	321
160	1	SARS	33	184	312624	312
161	1	SARS	33	184	306358	305
162	1	SARS	33	184	306228	304
163	1	SARS	33	184	318027	308
164	1	SARS	33	184	323116	323
165	1	SARS	33	184	304408	303
166	1	SARS	33	184	330783	330
167	1	SARS	33	184	3335	337
168	1	SARS	33	184	299573	299
169	1	SARS	33	184	314391	313
170	1	SARS	33	184	336896	335
171	1	SARS	33	184	299125	297
172	1	SARS	33	184	305373	304
173	1	SARS	33	184	313857	315
174	1	SARS	33	184	323099	321
175	1	SARS	33	184	32316	323
176	1	SARS	33	184	343152	343
177	1	SARS	33	184	303271	304
178	1	SARS	33	184	308408	306
179	1	SARS	33	184	304657	304
180	1	SARS	33	184	302941	302
181	1	SARS	33	184	322464	322
182	1	SARS	33	184	302712	302
183	1	SARS	33	184	297066	295
184	1	SARS	33	184	322063	322
185	1	SARS	33	184	314293	314
186	1	SARS	33	184	31391	313
187	1	SARS	33	184	30503	303
188	1	SARS	33	184	315278	315
189	1	SARS	33	184	307863	307
190	1	SARS	33	184	317241	315
191	1	SARS	33	184	344301	340
192	1	SARS	33	184	300996	300
193	1	SARS	33	184	313017	312
194	1	SARS	33	184	301432	301
195	1	SARS	33	184	315834	314
196	1	SARS	33	184	313	313
197	1	SARS	33	184	305891	304
198	1	SARS	33	184	319244	319
199	1	SARS	33	184	305497	304
200	1	SARS	33	184	319862	318
201	1	SARS	33	184	292711	292
202	1	SARS	33	184	305596	304
203	1	SARS	33	184	31403	313
204	1	SARS	33	184	313285	313
205	1	SARS	33	184	30255	302
206	1	SARS	33	184	340	340
207	1	SARS	33	184	305572	304
208	1	SARS	33	184	3261	323
209	1	SARS	33	184	328371	328
210	1	SARS	33	184	298678	297
211	1	SARS	33	184	315197	311
212	1	SARS	33	184	303238	302
213	1	SARS	33	184	289301	289
214	1	SARS	33	184	307126	306
215	1	SARS	33	184	301261	301
216	1	SARS	33	184	297883	296
217	1	SARS	33	184	28866	288
218	1	SARS	33	184	319962	319
219	1	SARS	33	184	293064	291
220	1	SARS	33	184	318808	318
221	1	SARS	33	184	327711	327
222	1	SARS	33	184	310749	310
223	1	SARS	33	184	313538	312
224	1	SARS	33	184	323092	321
225	1	SARS	33	184	314469	314
226	1	SARS	33	184	296782	296
227	1	SARS	33	184	316637	314
228	1	SARS	33	184	311049	310
229	1	SARS	33	184	317071	315
230	1	SARS	33	184	295896	295
231	1	SARS	33	184	308037	309
232	1	SARS	33	184	30211	302
233	1	SARS	33	184	292609	292
234	1	SARS	33	184	302251	301
235	1	SARS	33	184	298825	297
236	1	SARS	33	184	308987	308
237	1	SARS	33	184	301364	300
238	1	SARS	33	184	300436	299
239	1	SARS	33	184	306815	306
240	1	SARS	33	184	299138	298
241	1	SARS	33	184	314628	312
242	1	SARS	33	184	317644	317
243	1	SARS	33	184	3003	300
244	1	SARS	33	184	310042	309
245	1	SARS	33	184	305106	302
246	1	SARS	33	184	305179	304
247	1	SARS	33	184	314047	312
248	1	SARS	33	184	293	293
249	1	SARS	33	184	312203	311
250	1	SARS	33	184	297866	297
251	1	SARS	33	184	294608	294
252	1	SARS	33	184	310995	311
253	1	SARS	33	184	319446	320
254	1	SARS	33	184	311008	310
255	1	SARS	33	184	318911	319
256	1	SARS	33	184	310645	310
257	1	SARS	33	184	342263	340
258	1	SARS	33	184	301513	301
259	1	SARS	33	184	30043	299
260	1	SARS	33	184	306403	306
261	1	SARS	33	184	296895	297
262	1	SARS	33	184	32148	318
263	1	SARS	33	184	333612	333
264	1	SARS	33	184	308103	309
265	1	SARS	33	184	303968	303
266	1	SARS	33	184	320387	319
267	1	SARS	33	184	331714	330
268	1	SARS	33	184	297404	295
269	1	SARS	33	184	296657	296
270	1	SARS	33	184	304719	304
271	1	SARS	33	184	311157	310
272	1	SARS	33	184	305732	304
273	1	SARS	33	184	306255	305
274	1	SARS	33	184	307251	308
275	1	SARS	33	184	31137	310
276	1	SARS	33	184	295809	294
277	1	SARS	33	184	303482	303
278	1	SARS	33	184	324155	322
279	1	SARS	33	184	299396	298
280	1	SARS	33	184	298431	296
281	1	SARS	33	184	306559	305
282	1	SARS	33	184	325093	326
283	1	SARS	33	184	307959	307
284	1	SARS	33	184	289752	289
285	1	SARS	33	184	300606	298
286	1	SARS	33	184	310198	309
287	1	SARS	33	184	293404	293
288	1	SARS	33	184	303938	303
289	1	SARS	33	184	302339	302
290	1	SARS	33	184	319552	319
291	1	SARS	33	184	305178	304
292	1	SARS	33	184	318697	319
293	1	SARS	33	184	317845	318
294	1	SARS	33	184	325139	322
295	1	SARS	33	184	311097	310
296	1	SARS	33	184	32175	320
297	1	SARS	33	184	30851	307
298	1	SARS	33	184	307942	308
299	1	SARS	33	184	30221	301
300	1	SARS	33	184	3165	315
301	1	SARS	33	184	302501	302
302	1	SARS	33	184	294526	294
303	1	SARS	33	184	311065	311
304	1	SARS	33	184	301712	302
305	1	SARS	33	184	298285	298
306	1	SARS	33	184	302142	301
307	1	SARS	33	184	300418	300
308	1	SARS	33	184	290365	289
309	1	SARS	33	184	308913	309
310	1	SARS	33	184	306084	306
311	1	SARS	33	184	312042	312
312	1	SARS	33	184	292463	290
313	1	SARS	33	184	339362	337
314	1	SARS	33	184	298698	298
315	1	SARS	33	184	317332	315
316	1	SARS	33	184	311899	310
317	1	SARS	33	184	307875	306
318	1	SARS	33	184	304357	302
319	1	SARS	33	184	300521	300
320	1	SARS	33	184	306143	307
321	1	SARS	33	184	301882	300
322	1	SARS	33	184	303549	303
323	1	SARS	33	184	311385	310
324	1	SARS	33	184	353661	329
325	1	SARS	33	184	309859	309
326	1	SARS	33	184	294558	292
327	1	SARS	33	184	325	325
328	1	SARS	33	184	305003	296
329	1	SARS	33	184	297746	297
330	1	SARS	33	184	304878	304
331	1	SARS	33	184	348217	347
332	1	SARS	33	184	294035	293
333	1	SARS	33	184	294967	294
334	1	SARS	33	184	321602	322
335	1	SARS	33	184	321581	320
336	1	SARS	33	184	296455	295
337	1	SARS	33	184	296248	294
338	1	SARS	33	184	303492	303
339	1	SARS	33	184	30475	304
340	1	SARS	33	184	310858	309
341	1	SARS	33	184	303781	304
342	1	SARS	33	184	313448	312
343	1	SARS	33	184	321572	321
344	1	SARS	33	184	308334	308
345	1	SARS	33	184	298241	296
346	1	SARS	33	184	308225	305
347	1	SARS	33	184	29581	294
348	1	SARS	33	184	296994	296
349	1	SARS	33	184	301356	296
350	1	SARS	33	184	311436	311
351	1	SARS	33	184	314114	313
352	1	SARS	33	184	311108	309
353	1	SARS	33	184	320743	319
354	1	SARS	33	184	301321	301
355	1	SARS	33	184	316519	314
356	1	SARS	33	184	368436	315
357	1	SARS	33	184	31573	314
358	1	SARS	33	184	457561	463
359	1	SARS	33	184	320377	320
360	1	SARS	33	184	339986	338
361	1	SARS	33	184	31776	316
362	1	SARS	33	184	310456	310
363	1	SARS	33	184	3236	322
364	1	SARS	33	184	308687	309
365	1	SARS	33	184	300398	297
366	1	SARS	33	184	332141	332
367	1	SARS	33	184	299499	298
368	1	SARS	33	184	307402	306
369	1	SARS	33	184	329876	324
370	1	SARS	33	184	298246	296
371	1	SARS	33	184	288601	287
372	1	SARS	33	184	307967	308
373	1	SARS	33	184	31488	313
374	1	SARS	33	184	300371	300
375	1	SARS	33	184	45689	472
376	1	SARS	33	184	31055	309
377	1	SARS	33	184	311144	311
378	1	SARS	33	184	300973	301
379	1	SARS	33	184	309905	306
380	1	SARS	33	184	337018	337
381	1	SARS	33	184	339703	331
382	1	SARS	33	184	305325	303
383	1	SARS	33	184	323719	322
384	1	SARS	33	184	305029	304
385	1	SARS	33	184	316051	314
386	1	SARS	33	184	299588	298
387	1	SARS	33	184	295383	293
388	1	SARS	33	184	33538	335
389	1	SARS	33	184	326533	326
390	1	SARS	33	184	317745	318
391	1	SARS	33	184	329253	328
392	1	SARS	33	184	305746	304
393	1	SARS	33	184	316194	315
394	1	SARS	33	184	323303	322
395	1	SARS	33	184	290846	291
396	1	SARS	33	184	323308	320
397	1	SARS	33	184	308006	307
398	1	SARS	33	184	299521	299
399	1	SARS	33	184	310333	312
400	1	SARS	33	184	304847	304
401	1	SARS	33	184	305169	302
402	1	SARS	33	184	30822	306
403	1	SARS	33	184	365404	352
404	1	SARS	33	184	29058	289
405	1	SARS	33	184	320682	320
406	1	SARS	33	184	3159	305
407	1	SARS	33	184	309	309
408	1	SARS	33	184	302307	302
409	1	SARS	33	184	377068	354
410	1	SARS	33	184	326715	326
411	1	SARS	33	184	317974	317
412	1	SARS	33	184	293706	294
413	1	SARS	33	184	304	304
414	1	SARS	33	184	30675	312
415	1	SARS	33	184	298833	297
416	1	SARS	33	184	303913	304
417	1	SARS	33	184	318799	319
418	1	SARS	33	184	296487	296
419	1	SARS	33	184	312559	313
420	1	SARS	33	184	318646	318
421	1	SARS	33	184	326225	325
422	1	SARS	33	184	345719	344
423	1	SARS	33	184	301641	301
424	1	SARS	33	184	307759	308
425	1	SARS	33	184	307921	306
426	1	SARS	33	184	287506	287
427	1	SARS	33	184	324675	323
428	1	SARS	33	184	307714	307
429	1	SARS	33	184	315856	314
430	1	SARS	33	184	304419	303
431	1	SARS	33	184	312277	311
432	1	SARS	33	184	300025	298
433	1	SARS	33	184	307163	307
434	1	SARS	33	184	300555	300
435	1	SARS	33	184	309308	309
436	1	SARS	33	184	306375	306
437	1	SARS	33	184	304781	305
438	1	SARS	33	184	305546	304
439	1	SARS	33	184	29661	296
440	1	SARS	33	184	290238	290
441	1	SARS	33	184	302818	302
442	1	SARS	33	184	289	289
443	1	SARS	33	184	306976	306
444	1	SARS	33	184	306957	306
445	1	SARS	33	184	328823	326
446	1	SARS	33	184	306313	305
447	1	SARS	33	184	302265	303
448	1	SARS	33	184	346784	345
449	1	SARS	33	184	31021	310
450	1	SARS	33	184	33382	330
451	1	SARS	33	184	28581	285
452	1	SARS	33	184	310	310
453	1	SARS	33	184	292364	293
454	1	SARS	33	184	300335	299
455	1	SARS	33	184	32175	321
456	1	SARS	33	184	316702	314
457	1	SARS	33	184	294259	293
458	1	SARS	33	184	28888	287
459	1	SARS	33	184	30793	306
460	1	SARS	33	184	320722	319
461	1	SARS	33	184	307923	308
462	1	SARS	33	184	309923	308
463	1	SARS	33	184	321988	320
464	1	SARS	33	184	284431	285
465	1	SARS	33	184	309026	310
466	1	SARS	33	184	312433	312
467	1	SARS	33	184	312697	312
468	1	SARS	33	184	304031	302
469	1	SARS	33	184	300839	301
470	1	SARS	33	184	304478	303
471	1	SARS	33	184	305623	305
472	1	SARS	33	184	2966	296
473	1	SARS	33	184	296635	296
474	1	SARS	33	184	323387	323
475	1	SARS	33	184	332433	328
476	1	SARS	33	184	330257	328
477	1	SARS	33	184	296255	295
478	1	SARS	33	184	295331	295
479	1	SARS	33	184	304278	303
480	1	SARS	33	184	293566	293
481	1	SARS	33	184	300168	299
482	1	SARS	33	184	3239	322
483	1	SARS	33	184	296793	296
484	1	SARS	33	184	311964	311
485	1	SARS	33	184	324973	322
486	1	SARS	33	184	310668	308
487	1	SARS	33	184	299296	299
488	1	SARS	33	184	306233	306
489	1	SARS	33	184	312395	311
490	1	SARS	33	184	307367	306
491	1	SARS	33	184	293504	293
492	1	SARS	33	184	312614	311
493	1	SARS	33	184	300869	301
494	1	SARS	33	184	300477	298
495	1	SARS	33	184	301482	299
496	1	SARS	33	184	300017	300
497	1	SARS	33	184	317609	318
498	1	SARS	33	184	307939	308
499	1	SARS	33	184	298848	297
500	1	SARS	33	184	312819	312
501	1	SARS	33	184	306113	305
502	1	SARS	33	184	301021	300
503	1	SARS	33	184	300676	301
504	1	SARS	33	184	304708	305
505	1	SARS	33	184	304343	304
506	1	SARS	33	184	328195	324
507	1	SARS	33	184	308859	308
508	1	SARS	33	184	307331	306
509	1	SARS	33	184	316809	315
510	1	SARS	33	184	298664	298
511	1	SARS	33	184	304532	303
512	1	SARS	33	184	326819	323
513	1	SARS	33	184	305161	304
514	1	SARS	33	184	316563	313
515	1	SARS	33	184	304941	304
516	1	SARS	33	184	308259	306
517	1	SARS	33	184	300898	301
518	1	SARS	33	184	290596	291
519	1	SARS	33	184	30183	301
520	1	SARS	33	184	301887	301
521	1	SARS	33	184	30326	303
522	1	SARS	33	184	318041	316
523	1	SARS	33	184	306705	306
524	1	SARS	33	184	315875	314
525	1	SARS	33	184	292744	293
526	1	SARS	33	184	292273	292
527	1	SARS	33	184	293083	292
528	1	SARS	33	184	29579	295
529	1	SARS	33	184	314477	314
530	1	SARS	33	184	307735	308
531	1	SARS	33	184	304834	303
532	1	SARS	33	184	307982	308
533	1	SARS	33	184	312377	312
534	1	SARS	33	184	300638	300
535	1	SARS	33	184	304901	304
536	1	SARS	33	184	290735	291
537	1	SARS	33	184	299036	297
538	1	SARS	33	184	318732	319
539	1	SARS	33	184	303952	303
540	1	SARS	33	184	320259	319
541	1	SARS	33	184	311766	311
542	1	SARS	33	184	306731	306
543	1	SARS	33	184	3338	333
544	1	SARS	33	184	319909	320
545	1	SARS	33	184	293459	293
546	1	SARS	33	184	300992	300
547	1	SARS	33	184	306087	305
548	1	SARS	33	184	30835	308
549	1	SARS	33	184	319541	318
550	1	SARS	33	184	303528	300
551	1	SARS	33	184	314633	314
552	1	SARS	33	184	30593	305
553	1	SARS	33	184	302841	302
554	1	SARS	33	184	294337	294
555	1	SARS	33	184	289418	289
556	1	SARS	33	184	307119	305
557	1	SARS	33	184	330339	329
558	1	SARS	33	184	307	307
559	1	SARS	33	184	322274	321
560	1	SARS	33	184	292975	293
561	1	SARS	33	184	3098	310
562	1	SARS	33	184	309763	309
563	1	SARS	33	184	300476	300
564	1	SARS	33	184	301442	300
565	1	SARS	33	184	30762	308
566	1	SARS	33	184	330058	329
567	1	SARS	33	184	294635	294
568	1	SARS	33	184	296477	295
569	1	SARS	33	184	303746	303
570	1	SARS	33	184	298775	297
571	1	SARS	33	184	313674	313
572	1	SARS	33	184	309464	310
573	1	SARS	33	184	323125	322
574	1	SARS	33	184	309867	309
575	1	SARS	33	184	309298	306
576	1	SARS	33	184	312081	311
577	1	SARS	33	184	312965	313
578	1	SARS	33	184	317678	318
579	1	SARS	33	184	2894	290
580	1	SARS	33	184	323275	323
581	1	SARS	33	184	292801	292
582	1	SARS	33	184	301818	301
583	1	SARS	33	184	297022	297
584	1	SARS	33	184	303171	303
585	1	SARS	33	184	316455	314
586	1	SARS	33	184	299968	299
587	1	SARS	33	184	292486	292
588	1	SARS	33	184	336552	331
589	1	SARS	33	184	300428	298
590	1	SARS	33	184	297203	296
591	1	SARS	33	184	304445	303
592	1	SARS	33	184	315085	315
593	1	SARS	33	184	326786	326
594	1	SARS	33	184	29051	290
595	1	SARS	33	184	312726	312
596	1	SARS	33	184	308783	309
597	1	SARS	33	184	328932	328
598	1	SARS	33	184	306084	305
599	1	SARS	33	184	315806	315
600	1	SARS	33	184	30629	304
601	1	SARS	33	184	29979	298
602	1	SARS	33	184	304933	304
603	1	SARS	33	184	311362	312
604	1	SARS	33	184	308273	308
605	1	SARS	33	184	329245	328
606	1	SARS	33	184	300545	300
607	1	SARS	33	184	291793	292
608	1	SARS	33	184	329167	330
609	1	SARS	33	184	313226	313
610	1	SARS	33	184	298422	297
611	1	SARS	33	184	303095	303
612	1	SARS	33	184	31783	315
613	1	SARS	33	184	295519	294
614	1	SARS	33	184	301335	301
615	1	SARS	33	184	304718	304
616	1	SARS	33	184	300639	302
617	1	SARS	33	184	301323	301
618	1	SARS	33	184	31661	315
619	1	SARS	33	184	328951	328
620	1	SARS	33	184	315369	314
621	1	SARS	33	184	293702	293
622	1	SARS	33	184	318613	315
623	1	SARS	33	184	307333	306
624	1	SARS	33	184	30781	305
625	1	SARS	33	184	305574	305
626	1	SARS	33	184	29717	297
627	1	SARS	33	184	307104	306
628	1	SARS	33	184	316513	316
629	1	SARS	33	184	304817	305
630	1	SARS	33	184	292392	292
631	1	SARS	33	184	308245	306
632	1	SARS	33	184	296294	296
633	1	SARS	33	184	305689	305
634	1	SARS	33	184	290071	289
635	1	SARS	33	184	304235	303
636	1	SARS	33	184	302428	302
637	1	SARS	33	184	305033	304
638	1	SARS	33	184	314666	312
639	1	SARS	33	184	315301	314
640	1	SARS	33	184	30687	306
641	1	SARS	33	184	321619	320
642	1	SARS	33	184	310393	310
643	1	SARS	33	184	312404	311
644	1	SARS	33	184	294618	294
645	1	SARS	33	184	29593	295
646	1	SARS	33	184	284728	283
647	1	SARS	33	184	32284	319
648	1	SARS	33	184	311537	311
649	1	SARS	33	184	310981	312
650	1	SARS	33	184	296749	296
651	1	SARS	33	184	30585	306
652	1	SARS	33	184	284953	284
653	1	SARS	33	184	313251	313
654	1	SARS	33	184	309958	307
655	1	SARS	33	184	30182	301
656	1	SARS	33	184	310603	310
657	1	SARS	33	184	312703	312
658	1	SARS	33	184	296769	296
659	1	SARS	33	184	301635	301
660	1	SARS	33	184	343833	349
661	1	SARS	33	184	299027	298
662	1	SARS	33	184	343599	342
663	1	SARS	33	184	305352	305
664	1	SARS	33	184	324522	322
665	1	SARS	33	184	304217	303
666	1	SARS	33	184	317536	317
667	1	SARS	33	184	299867	298
668	1	SARS	33	184	306362	306
669	1	SARS	33	184	299797	301
670	1	SARS	33	184	293637	293
671	1	SARS	33	184	29619	295
672	1	SARS	33	184	308242	306
673	1	SARS	33	184	295082	295
674	1	SARS	33	184	307726	308
675	1	SARS	33	184	314369	313
676	1	SARS	33	184	308255	306
677	1	SARS	33	184	292345	292
678	1	SARS	33	184	29117	289
679	1	SARS	33	184	307462	306
680	1	SARS	33	184	2985	311
681	1	SARS	33	184	299617	298
682	1	SARS	33	184	311158	310
683	1	SARS	33	184	327381	328
684	1	SARS	33	184	300054	299
685	1	SARS	33	184	306934	306
686	1	SARS	33	184	287615	287
687	1	SARS	33	184	316269	314
688	1	SARS	33	184	30204	301
689	1	SARS	33	184	293629	293
690	1	SARS	33	184	289254	288
691	1	SARS	33	184	315189	313
692	1	SARS	33	184	316	313
693	1	SARS	33	184	307456	306
694	1	SARS	33	184	325911	325
695	1	SARS	33	184	306889	305
696	1	SARS	33	184	292379	292
697	1	SARS	33	184	312648	312
698	1	SARS	33	184	296777	295
699	1	SARS	33	184	320612	319
700	1	SARS	33	184	305294	304
701	1	SARS	33	184	297209	293
702	1	SARS	33	184	283206	282
703	1	SARS	33	184	304151	303
704	1	SARS	33	184	312775	312
705	1	SARS	33	184	29877	297
706	1	SARS	33	184	303534	303
707	1	SARS	33	184	301587	301
708	1	SARS	33	184	307983	306
709	1	SARS	33	184	311664	311
710	1	SARS	33	184	302284	302
711	1	SARS	33	184	285636	285
712	1	SARS	33	184	317271	317
713	1	SARS	33	184	294674	295
714	1	SARS	33	184	306144	305
715	1	SARS	33	184	336101	336
716	1	SARS	33	184	307414	306
717	1	SARS	33	184	281478	279
718	1	SARS	33	184	325269	324
719	1	SARS	33	184	321403	321
720	1	SARS	33	184	316642	315
721	1	SARS	33	184	315076	314
722	1	SARS	33	184	311821	311
723	1	SARS	33	184	301954	302
724	1	SARS	33	184	317351	315
725	1	SARS	33	184	304854	304
726	1	SARS	33	184	303117	302
727	1	SARS	33	184	331118	331
728	1	SARS	33	184	295543	294
729	1	SARS	33	184	289876	289
730	1	SARS	33	184	316252	316
731	1	SARS	33	184	307769	307
732	1	SARS	33	184	310739	309
733	1	SARS	33	184	283859	284
734	1	SARS	33	184	298401	296
735	1	SARS	33	184	300314	300
736	1	SARS	33	184	27376	274
737	1	SARS	33	184	318429	315
738	1	SARS	33	184	319662	318
739	1	SARS	33	184	304503	304
740	1	SARS	33	184	304015	303
741	1	SARS	33	184	308584	310
742	1	SARS	33	184	297368	296
743	1	SARS	33	184	307867	307
744	1	SARS	33	184	310517	311
745	1	SARS	33	184	320508	320
746	1	SARS	33	184	296749	296
747	1	SARS	33	184	287885	287
748	1	SARS	33	184	29765	296
749	1	SARS	33	184	309423	309
750	1	SARS	33	184	299812	298
751	1	SARS	33	184	294507	292
752	1	SARS	33	184	299212	298
753	1	SARS	33	184	303619	303
754	1	SARS	33	184	289991	289
755	1	SARS	33	184	29654	296
756	1	SARS	33	184	315497	314
757	1	SARS	33	184	312319	311
758	1	SARS	33	184	30007	297
759	1	SARS	33	184	319715	318
760	1	SARS	33	184	316323	314
761	1	SARS	33	184	300701	299
762	1	SARS	33	184	30419	303
763	1	SARS	33	184	29957	299
764	1	SARS	33	184	307253	305
765	1	SARS	33	184	302817	302
766	1	SARS	33	184	321495	319
767	1	SARS	33	184	307126	305
768	1	SARS	33	184	303006	303
769	1	SARS	33	184	313031	311
770	1	SARS	33	184	317474	317
771	1	SARS	33	184	298737	298
772	1	SARS	33	184	325762	325
773	1	SARS	33	184	344293	344
774	1	SARS	33	184	294838	293
775	1	SARS	33	184	291296	291
776	1	SARS	33	184	324697	324
777	1	SARS	33	184	298452	297
778	1	SARS	33	184	309239	310
779	1	SARS	33	184	29648	296
780	1	SARS	33	184	315479	315
781	1	SARS	33	184	302619	302
782	1	SARS	33	184	29929	300
783	1	SARS	33	184	295171	294
784	1	SARS	33	184	295095	295
785	1	SARS	33	184	301506	302
786	1	SARS	33	184	28369	283
787	1	SARS	33	184	306	304
788	1	SARS	33	184	307591	306
789	1	SARS	33	184	288749	288
790	1	SARS	33	184	303407	303
791	1	SARS	33	184	297348	296
792	1	SARS	33	184	305876	304
793	1	SARS	33	184	293633	294
794	1	SARS	33	184	305981	305
795	1	SARS	33	184	291648	292
796	1	SARS	33	184	301711	301
797	1	SARS	33	184	273972	273
798	1	SARS	33	184	310679	310
799	1	SARS	33	184	306956	306
800	1	SARS	33	184	30031	299
801	1	SARS	33	184	291134	291
802	1	SARS	33	184	295994	296
803	1	SARS	33	184	299555	298
804	1	SARS	33	184	300289	301
805	1	SARS	33	184	290137	288
806	1	SARS	33	184	284524	283
807	1	SARS	33	184	288826	287
808	1	SARS	33	184	295259	295
809	1	SARS	33	184	305477	304
810	1	SARS	33	184	316165	315
811	1	SARS	33	184	30534	304
812	1	SARS	33	184	308889	307
813	1	SARS	33	184	307316	308
814	1	SARS	33	184	309331	310
815	1	SARS	33	184	287486	286
816	1	SARS	33	184	291827	292
817	1	SARS	33	184	29697	295
818	1	SARS	33	184	312885	312
819	1	SARS	33	184	289486	289
820	1	SARS	33	184	283708	283
821	1	SARS	33	184	288051	288
822	1	SARS	33	184	31619	315
823	1	SARS	33	184	296121	295
824	1	SARS	33	184	305147	304
825	1	SARS	33	184	301212	301
826	1	SARS	33	184	320838	320
827	1	SARS	33	184	296632	296
828	1	SARS	33	184	290143	289
829	1	SARS	33	184	300224	298
830	1	SARS	33	184	319227	318
831	1	SARS	33	184	291678	291
832	1	SARS	33	184	299992	300
833	1	SARS	33	184	284904	286
834	1	SARS	33	184	303956	304
835	1	SARS	33	184	285	285
836	1	SARS	33	184	297815	297
837	1	SARS	33	184	299923	297
838	1	SARS	33	184	296718	296
839	1	SARS	33	184	310844	309
840	1	SARS	33	184	282619	283
841	1	SARS	33	184	296646	295
842	1	SARS	33	184	292196	291
843	1	SARS	33	184	289395	290
844	1	SARS	33	184	291728	291
845	1	SARS	33	184	31465	314
846	1	SARS	33	184	293931	294
847	1	SARS	33	184	30806	306
848	1	SARS	33	184	29951	298
849	1	SARS	33	184	306	306
850	1	SARS	33	184	297132	296
851	1	SARS	33	184	302893	301
852	1	SARS	33	184	288569	287
853	1	SARS	33	184	307117	306
854	1	SARS	33	184	296832	296
855	1	SARS	33	184	294294	293
856	1	SARS	33	184	282192	283
857	1	SARS	33	184	285259	284
858	1	SARS	33	184	294658	295
859	1	SARS	33	184	28055	279
860	1	SARS	33	184	305808	305
861	1	SARS	33	184	297619	296
862	1	SARS	33	184	311152	309
863	1	SARS	33	184	299461	299
864	1	SARS	33	184	315126	315
865	1	SARS	33	184	291118	290
866	1	SARS	33	184	28996	289
867	1	SARS	33	184	313126	312
868	1	SARS	33	184	289737	289
869	1	SARS	33	184	293766	293
870	1	SARS	33	184	290364	292
871	1	SARS	33	184	324708	323
872	1	SARS	33	184	289162	289
873	1	SARS	33	184	274857	275
874	1	SARS	33	184	301213	300
875	1	SARS	33	184	302524	302
876	1	SARS	33	184	309041	309
877	1	SARS	33	184	297437	296
878	1	SARS	33	184	294223	294
879	1	SARS	33	184	30219	302
880	1	SARS	33	184	288365	288
881	1	SARS	33	184	283847	284
882	1	SARS	33	184	323156	326
883	1	SARS	33	184	304498	304
884	1	SARS	33	184	321986	320
885	1	SARS	33	184	313489	313
886	1	SARS	33	184	290162	290
887	1	SARS	33	184	293867	293
888	1	SARS	33	184	295454	295
889	1	SARS	33	184	291131	291
890	1	SARS	33	184	281403	280
891	1	SARS	33	184	30704	304
892	1	SARS	33	184	279479	279
893	1	SARS	33	184	283579	283
894	1	SARS	33	184	288276	288
895	1	SARS	33	184	30541	306
896	1	SARS	33	184	312472	312
897	1	SARS	33	184	276982	276
898	1	SARS	33	184	298708	298
899	1	SARS	33	184	291761	291
900	1	SARS	33	184	29207	292
901	1	SARS	33	184	296701	295
902	1	SARS	33	184	286872	285
903	1	SARS	33	184	308756	308
904	1	SARS	33	184	300803	301
905	1	SARS	33	184	286011	285
906	1	SARS	33	184	313372	312
907	1	SARS	33	184	290896	290
908	1	SARS	33	184	298272	297
909	1	SARS	33	184	297117	297
910	1	SARS	33	184	285356	285
911	1	SARS	33	184	317662	317
912	1	SARS	33	184	303755	301
913	1	SARS	33	184	313509	313
914	1	SARS	33	184	306856	305
915	1	SARS	33	184	303107	302
916	1	SARS	33	184	310734	310
917	1	SARS	33	184	308978	309
918	1	SARS	33	184	29349	293
919	1	SARS	33	184	287114	286
920	1	SARS	33	184	285773	285
921	1	SARS	33	184	283327	284
922	1	SARS	33	184	299045	298
923	1	SARS	33	184	313467	313
924	1	SARS	33	184	283801	283
925	1	SARS	33	184	305686	305
926	1	SARS	33	184	290635	291
927	1	SARS	33	184	293413	293
928	1	SARS	33	184	279355	278
929	1	SARS	33	184	302267	302
930	1	SARS	33	184	287705	287
931	1	SARS	33	184	289276	289
932	1	SARS	33	184	28612	286
933	1	SARS	33	184	279584	278
934	1	SARS	33	184	278498	278
935	1	SARS	33	184	295354	295
936	1	SARS	33	184	302709	302
937	1	SARS	33	184	283462	283
938	1	SARS	33	184	323	323
939	1	SARS	33	184	308052	307
940	1	SARS	33	184	324682	325
941	1	SARS	33	184	290984	291
942	1	SARS	33	184	310206	311
943	1	SARS	33	184	289	289
944	1	SARS	33	185	360704	360
945	1	SARS	33	185	363209	363
946	1	SARS	33	185	351388	351
947	1	SARS	33	185	350831	352
948	1	SARS	33	185	331169	332
949	1	SARS	33	185	336914	337
950	1	SARS	33	185	292379	291
951	1	SARS	33	185	342171	340
952	1	SARS	33	185	324897	324
953	1	SARS	33	185	29128	288
954	1	SARS	33	185	347121	343
955	1	SARS	33	185	3226	322
956	1	SARS	33	185	312173	311
957	1	SARS	33	185	286957	286
958	1	SARS	33	185	334764	334
959	1	SARS	33	185	364885	364
960	1	SARS	33	185	29985	297
961	1	SARS	33	185	323429	322
962	1	SARS	33	185	351102	351
963	1	SARS	33	185	320467	317
964	1	SARS	33	185	338623	338
965	1	SARS	33	185	356775	357
966	1	SARS	33	185	30727	304
967	1	SARS	33	185	362667	364
968	1	SARS	33	185	346049	345
969	1	SARS	33	185	353	359
970	1	SARS	33	185	30834	308
971	1	SARS	33	185	285877	285
972	1	SARS	33	185	36212	362
973	1	SARS	33	185	374196	376
974	1	SARS	33	185	300788	298
975	1	SARS	33	185	302772	302
976	1	SARS	33	185	349658	348
977	1	SARS	33	185	35616	355
978	1	SARS	33	185	289818	288
979	1	SARS	33	185	293557	294
980	1	SARS	33	185	311111	313
981	1	SARS	33	185	354053	355
982	1	SARS	33	185	309053	309
983	1	SARS	33	185	362942	365
984	1	SARS	33	185	321161	319
985	1	SARS	33	185	312773	311
986	1	SARS	33	185	323138	322
987	1	SARS	33	185	348159	346
988	1	SARS	33	185	345997	344
989	1	SARS	33	185	333719	334
990	1	SARS	33	185	31142	307
991	1	SARS	33	185	346185	346
992	1	SARS	33	185	369	368
993	1	SARS	33	185	308	306
994	1	SARS	33	185	28591	284
995	1	SARS	33	185	356848	357
996	1	SARS	33	185	356063	355
997	1	SARS	33	185	286674	286
998	1	SARS	33	185	287484	287
999	1	SARS	33	185	325	323
1000	1	SARS	33	185	339333	342
1001	1	SARS	33	185	346794	349
1002	1	SARS	33	185	303329	302
1003	1	SARS	33	185	311818	310
1004	1	SARS	33	185	361677	361
1005	1	SARS	33	185	353134	353
1006	1	SARS	33	185	336385	336
1007	1	SARS	33	185	355604	353
1008	1	SARS	33	185	287109	286
1009	1	SARS	33	185	293888	293
1010	1	SARS	33	185	303363	302
1011	1	SARS	33	185	332272	331
1012	1	SARS	33	185	343803	344
1013	1	SARS	33	185	303923	303
1014	1	SARS	33	185	299611	297
1015	1	SARS	33	185	348189	347
1016	1	SARS	33	185	317259	316
1017	1	SARS	33	185	301305	299
1018	1	SARS	33	185	356113	355
1019	1	SARS	33	185	313553	313
1020	1	SARS	33	185	351045	349
1021	1	SARS	33	185	354776	356
1022	1	SARS	33	185	30891	309
1023	1	SARS	33	185	291471	290
1024	1	SARS	33	185	283119	282
1025	1	SARS	33	185	370507	371
1026	1	SARS	33	185	333405	332
1027	1	SARS	33	185	351013	351
1028	1	SARS	33	185	301489	300
1029	1	SARS	33	185	320603	320
1030	1	SARS	33	185	651408	697
1031	1	SARS	33	185	316292	315
1032	1	SARS	33	185	311963	311
1033	1	SARS	33	185	286595	286
1034	1	SARS	33	185	33925	340
1035	1	SARS	33	185	332592	331
1036	1	SARS	33	185	455607	337
1037	1	SARS	33	185	310915	311
1038	1	SARS	33	185	3485	349
1039	1	SARS	33	185	309249	309
1040	1	SARS	33	185	363889	364
1041	1	SARS	33	185	299969	297
1042	1	SARS	33	185	382467	381
1043	1	SARS	33	185	302033	296
1044	1	SARS	33	185	362847	360
1045	1	SARS	33	185	311403	311
1046	1	SARS	33	185	303222	302
1047	1	SARS	33	185	355919	355
1048	1	SARS	33	185	292695	291
1049	1	SARS	33	185	3326	331
1050	1	SARS	33	185	663147	660
1051	1	SARS	33	185	328185	327
1052	1	SARS	33	185	306018	305
1053	1	SARS	33	185	312695	311
1054	1	SARS	33	185	298985	298
1055	1	SARS	33	185	299689	300
1056	1	SARS	33	185	34361	344
1057	1	SARS	33	185	301507	301
1058	1	SARS	33	185	763983	759
1059	1	SARS	33	185	305822	305
1060	1	SARS	33	185	337913	338
1061	1	SARS	33	185	347283	347
1062	1	SARS	33	185	339261	340
1063	1	SARS	33	185	363444	364
1064	1	SARS	33	185	902583	914
1065	1	SARS	33	185	538989	523
1066	1	SARS	33	185	325389	325
1067	1	SARS	33	185	308968	306
1068	1	SARS	33	185	29258	292
1069	1	SARS	33	185	327556	323
1070	1	SARS	33	185	301494	298
1071	1	SARS	33	185	375814	374
1072	1	SARS	33	185	373169	317
1073	1	SARS	33	185	310338	310
1074	1	SARS	33	185	290723	291
1075	1	SARS	33	185	313598	312
1076	1	SARS	33	185	337133	336
1077	1	SARS	33	185	298809	297
1078	1	SARS	33	185	346	344
1079	1	SARS	33	185	355527	355
1080	1	SARS	33	185	391833	391
1081	1	SARS	33	185	308	313
1082	1	SARS	33	185	308826	308
1083	1	SARS	33	185	324095	323
1084	1	SARS	33	185	294103	293
1085	1	SARS	33	185	353157	351
1086	1	SARS	33	185	347347	344
1087	1	SARS	33	185	340353	338
1088	1	SARS	33	185	395	395
1089	1	SARS	33	185	306156	307
1090	1	SARS	33	185	292161	292
1091	1	SARS	33	185	329803	328
1092	1	SARS	33	185	383567	381
1093	1	SARS	33	185	922931	924
1094	1	SARS	33	185	321765	322
1095	1	SARS	33	185	311396	310
1096	1	SARS	33	185	325852	324
1097	1	SARS	33	185	324116	322
1098	1	SARS	33	185	321727	321
1099	1	SARS	33	185	325462	324
1100	1	SARS	33	185	433521	396
1101	1	SARS	33	185	357982	359
1102	1	SARS	33	185	315546	314
1103	1	SARS	33	185	328249	329
1104	1	SARS	33	185	338579	338
1105	1	SARS	33	185	382763	355
1106	1	SARS	33	185	311799	311
1107	1	SARS	33	185	32708	327
1108	1	SARS	33	185	299831	297
1109	1	SARS	33	185	350271	352
1110	1	SARS	33	185	29372	293
1111	1	SARS	33	185	348215	347
1112	1	SARS	33	185	28169	281
1113	1	SARS	33	185	321587	317
1114	1	SARS	33	185	296036	294
1115	1	SARS	33	185	333312	330
1116	1	SARS	33	185	291131	287
1117	1	SARS	33	185	291124	289
1118	1	SARS	33	185	320433	320
1119	1	SARS	33	185	325793	325
1120	1	SARS	33	185	298096	296
1121	1	SARS	33	185	291067	293
1122	1	SARS	33	185	327705	327
1123	1	SARS	33	185	29747	295
1124	1	SARS	33	185	335646	335
1125	1	SARS	33	185	308499	307
1126	1	SARS	33	185	314159	314
1127	1	SARS	33	185	330109	327
1128	1	SARS	33	185	326713	326
1129	1	SARS	33	185	32752	325
1130	1	SARS	33	185	323229	318
1131	1	SARS	33	185	307091	308
1132	1	SARS	33	185	323587	323
1133	1	SARS	33	185	314885	313
1134	1	SARS	33	185	336431	336
1135	1	SARS	33	185	354351	353
1136	1	SARS	33	185	322828	321
1137	1	SARS	33	185	335979	337
1138	1	SARS	33	185	313667	318
1139	1	SARS	33	185	305414	304
1140	1	SARS	33	185	327768	326
1141	1	SARS	33	185	300593	301
1142	1	SARS	33	185	339383	339
1143	1	SARS	33	185	325302	323
1144	1	SARS	33	185	320151	320
1145	1	SARS	33	185	33202	328
1146	1	SARS	33	185	29611	294
1147	1	SARS	33	185	299363	298
1148	1	SARS	33	185	31818	315
1149	1	SARS	33	185	317	317
1150	1	SARS	33	185	3344	333
1151	1	SARS	33	185	321289	320
1152	1	SARS	33	185	305212	304
1153	1	SARS	33	185	318741	315
1154	1	SARS	33	185	304737	304
1155	1	SARS	33	185	32377	322
1156	1	SARS	33	185	305545	305
1157	1	SARS	33	185	312096	312
1158	1	SARS	33	185	338424	335
1159	1	SARS	33	185	307423	305
1160	1	SARS	33	185	295461	293
1161	1	SARS	33	185	310629	310
1162	1	SARS	33	185	292155	291
1163	1	SARS	33	185	333508	332
1164	1	SARS	33	185	303353	303
1165	1	SARS	33	185	326231	323
1166	1	SARS	33	185	33005	329
1167	1	SARS	33	185	313583	315
1168	1	SARS	33	185	284898	284
1169	1	SARS	33	185	305784	305
1170	1	SARS	33	185	2988	300
1171	1	SARS	33	185	298985	297
1172	1	SARS	33	185	3129	312
1173	1	SARS	33	185	288724	288
1174	1	SARS	33	185	315734	313
1175	1	SARS	33	185	322333	324
1176	1	SARS	33	185	293229	292
1177	1	SARS	33	185	316634	315
1178	1	SARS	33	185	306618	305
1179	1	SARS	33	185	311919	311
1180	1	SARS	33	185	32557	324
1181	1	SARS	33	185	311337	312
1182	1	SARS	33	185	303184	303
1183	1	SARS	33	185	332403	332
1184	1	SARS	33	185	328159	328
1185	1	SARS	33	185	31073	311
1186	1	SARS	33	185	308315	307
1187	1	SARS	33	185	303275	303
1188	1	SARS	33	185	315973	313
1189	1	SARS	33	185	292023	292
1190	1	SARS	33	185	30944	309
1191	1	SARS	33	185	320558	321
1192	1	SARS	33	185	313376	310
1193	1	SARS	33	185	318511	319
1194	1	SARS	33	185	305795	305
1195	1	SARS	33	185	324414	322
1196	1	SARS	33	185	295515	295
1197	1	SARS	33	185	29705	295
1198	1	SARS	33	185	321224	318
1199	1	SARS	33	185	313656	312
1200	1	SARS	33	185	306043	305
1201	1	SARS	33	185	318092	318
1202	1	SARS	33	185	302085	302
1203	1	SARS	33	185	313116	311
1204	1	SARS	33	185	292164	292
1205	1	SARS	33	185	324378	325
1206	1	SARS	33	185	328803	328
1207	1	SARS	33	185	29255	291
1208	1	SARS	33	185	305762	304
1209	1	SARS	33	185	303692	303
1210	1	SARS	33	185	299266	298
1211	1	SARS	33	185	288523	287
1212	1	SARS	33	185	308595	306
1213	1	SARS	33	185	309513	308
1214	1	SARS	33	185	304764	302
1215	1	SARS	33	185	291795	291
1216	1	SARS	33	185	306734	305
1217	1	SARS	33	185	306528	305
1218	1	SARS	33	185	312838	312
1219	1	SARS	33	185	315837	315
1220	1	SARS	33	185	298434	297
1221	1	SARS	33	185	304215	302
1222	1	SARS	33	185	295471	294
1223	1	SARS	33	185	281619	280
1224	1	SARS	33	185	277	277
1225	1	SARS	33	185	305824	303
1226	1	SARS	33	185	316528	315
1227	1	SARS	33	185	299518	301
1228	1	SARS	33	185	314376	313
1229	1	SARS	33	185	304106	304
1230	1	SARS	33	185	301035	301
1231	1	SARS	33	185	287487	286
1232	1	SARS	33	185	298299	297
1233	1	SARS	33	185	320696	318
1234	1	SARS	33	185	310552	311
1235	1	SARS	33	185	299213	297
1236	1	SARS	33	185	301243	299
1237	1	SARS	33	185	297337	297
1238	1	SARS	33	185	306247	304
1239	1	SARS	33	185	307291	305
1240	1	SARS	33	185	296952	295
1241	1	SARS	33	185	312258	311
1242	1	SARS	33	185	312653	312
1243	1	SARS	33	185	29014	289
1244	1	SARS	33	185	29809	296
1245	1	SARS	33	185	301483	300
1246	1	SARS	33	185	309971	309
1247	1	SARS	33	185	311707	311
1248	1	SARS	33	185	302743	302
1249	1	SARS	33	185	30118	301
1250	1	SARS	33	185	291735	290
1251	1	SARS	33	185	299833	298
1252	1	SARS	33	185	325724	324
1253	1	SARS	33	185	289829	289
1254	1	SARS	33	185	306843	305
1255	1	SARS	33	185	298639	297
1256	1	SARS	33	185	285201	285
1257	1	SARS	33	185	299903	296
1258	1	SARS	33	185	325562	325
1259	1	SARS	33	185	2902	289
1260	1	SARS	33	185	315573	317
1261	1	SARS	33	185	290592	287
1262	1	SARS	33	185	292003	292
1263	1	SARS	33	185	328104	327
1264	1	SARS	33	185	294862	294
1265	1	SARS	33	185	305248	304
1266	1	SARS	33	185	291156	292
1267	1	SARS	33	185	293973	291
1268	1	SARS	33	185	297714	295
1269	1	SARS	33	185	305133	304
1270	1	SARS	33	185	301487	301
1271	1	SARS	33	185	293595	292
1272	1	SARS	33	185	312496	309
1273	1	SARS	33	185	307652	306
1274	1	SARS	33	185	302576	302
1275	1	SARS	33	185	299624	298
1276	1	SARS	33	185	316069	314
1277	1	SARS	33	185	29233	292
1278	1	SARS	33	185	309987	310
1279	1	SARS	33	185	28614	285
1280	1	SARS	33	185	295229	293
1281	1	SARS	33	185	297743	297
1282	1	SARS	33	185	297424	296
1283	1	SARS	33	185	299497	298
1284	1	SARS	33	185	301796	300
1285	1	SARS	33	185	301703	300
1286	1	SARS	33	185	295518	294
1287	1	SARS	33	185	289235	288
1288	1	SARS	33	185	288848	287
1289	1	SARS	33	185	295829	295
1290	1	SARS	33	185	287891	286
1291	1	SARS	33	185	297515	296
1292	1	SARS	33	185	306751	305
1293	1	SARS	33	185	285614	284
1294	1	SARS	33	185	302133	301
1295	1	SARS	33	185	296544	296
1296	1	SARS	33	185	295584	295
1297	1	SARS	33	185	283636	283
1298	1	SARS	33	185	284103	283
1299	1	SARS	33	185	296014	295
1300	1	SARS	33	185	310932	309
1301	1	SARS	33	185	297859	297
1302	1	SARS	33	185	302977	302
1303	1	SARS	33	185	288388	286
1304	1	SARS	33	185	292713	292
1305	1	SARS	33	185	298349	297
1306	1	SARS	33	185	29403	293
1307	1	SARS	33	185	297929	297
1308	1	SARS	33	185	300652	299
1309	1	SARS	33	185	298218	297
1310	1	SARS	33	185	293487	293
1311	1	SARS	33	185	312128	311
1312	1	SARS	33	185	297668	296
1313	1	SARS	33	185	294268	291
1314	1	SARS	33	185	303317	303
1315	1	SARS	33	185	30752	307
1316	1	SARS	33	185	300451	299
1317	1	SARS	33	185	298512	297
1318	1	SARS	33	185	293647	294
1319	1	SARS	33	185	29091	291
1320	1	SARS	33	185	283454	283
1321	1	SARS	33	185	292278	291
1322	1	SARS	33	185	29378	293
1323	1	SARS	33	185	285758	285
1324	1	SARS	33	185	304568	303
1325	1	SARS	33	185	30512	304
1326	1	SARS	33	185	286561	285
1327	1	SARS	33	185	285951	286
1328	1	SARS	33	185	304262	304
1329	1	SARS	33	185	31701	315
1330	1	SARS	33	185	292747	292
1331	1	SARS	33	185	285516	285
1332	1	SARS	33	185	292959	292
1333	1	SARS	33	185	315498	315
1334	1	SARS	33	185	292603	293
1335	1	SARS	33	185	319093	320
1336	1	SARS	33	185	309624	309
1337	1	SARS	33	185	298819	299
1338	1	SARS	33	185	302089	301
1339	1	SARS	33	185	296698	293
1340	1	SARS	33	185	303736	303
1341	1	SARS	33	185	320515	315
1342	1	SARS	33	185	307872	308
1343	1	SARS	33	185	299468	298
1344	1	SARS	33	185	317896	312
1345	1	SARS	33	185	285521	285
1346	1	SARS	33	185	308349	308
1347	1	SARS	33	185	311224	311
1348	1	SARS	33	185	302964	301
1349	1	SARS	33	185	296212	294
1350	1	SARS	33	185	294154	293
1351	1	SARS	33	185	291803	290
1352	1	SARS	33	185	297943	300
1353	1	SARS	33	185	308269	306
1354	1	SARS	33	185	302347	300
1355	1	SARS	33	185	296744	296
1356	1	SARS	33	185	324089	321
1357	1	SARS	33	185	319995	314
1358	1	SARS	33	185	297736	296
1359	1	SARS	33	185	306659	304
1360	1	SARS	33	185	309208	308
1361	1	SARS	33	185	291405	291
1362	1	SARS	33	185	302749	303
1363	1	SARS	33	185	297614	296
1364	1	SARS	33	185	294491	293
1365	1	SARS	33	185	303572	302
1366	1	SARS	33	185	314344	312
1367	1	SARS	33	185	302148	301
1368	1	SARS	33	185	297433	296
1369	1	SARS	33	185	300833	299
1370	1	SARS	33	185	29308	292
1371	1	SARS	33	185	301228	301
1372	1	SARS	33	185	322879	322
1373	1	SARS	33	185	290151	288
1374	1	SARS	33	185	288807	288
1375	1	SARS	33	185	310672	308
1376	1	SARS	33	185	302944	302
1377	1	SARS	33	185	305822	304
1378	1	SARS	33	185	301304	300
1379	1	SARS	33	185	298046	297
1380	1	SARS	33	185	293208	292
1381	1	SARS	33	185	290257	289
1382	1	SARS	33	185	298704	297
1383	1	SARS	33	185	298975	297
1384	1	SARS	33	185	310872	312
1385	1	SARS	33	185	293093	291
1386	1	SARS	33	185	305606	302
1387	1	SARS	33	185	321191	318
1388	1	SARS	33	185	294998	294
1389	1	SARS	33	185	276232	276
1390	1	SARS	33	185	31023	310
1391	1	SARS	33	185	305075	304
1392	1	SARS	33	185	305985	305
1393	1	SARS	33	185	323741	323
1394	1	SARS	33	185	297317	296
1395	1	SARS	33	185	306448	304
1396	1	SARS	33	185	327199	327
1397	1	SARS	33	185	298821	296
1398	1	SARS	33	185	29434	293
1399	1	SARS	33	185	333612	332
1400	1	SARS	33	185	285934	284
1401	1	SARS	33	185	313762	312
1402	1	SARS	33	185	302364	301
1403	1	SARS	33	185	295694	295
1404	1	SARS	33	185	29631	294
1405	1	SARS	33	185	298856	295
1406	1	SARS	33	185	299941	300
1407	1	SARS	33	185	306298	304
1408	1	SARS	33	185	308315	306
1409	1	SARS	33	185	297308	295
1410	1	SARS	33	185	299298	299
1411	1	SARS	33	185	30045	299
1412	1	SARS	33	185	279646	279
1413	1	SARS	33	185	287365	287
1414	1	SARS	33	185	292513	291
1415	1	SARS	33	185	286214	285
1416	1	SARS	33	185	294178	292
1417	1	SARS	33	185	292964	293
1418	1	SARS	33	185	276537	277
1419	1	SARS	33	185	300266	298
1420	1	SARS	33	185	292293	292
1421	1	SARS	33	185	289814	288
1422	1	SARS	33	185	300834	299
1423	1	SARS	33	185	291875	291
1424	1	SARS	33	185	301168	300
1425	1	SARS	33	185	292788	292
1426	1	SARS	33	185	290828	291
1427	1	SARS	33	185	292158	291
1428	1	SARS	33	185	299245	297
1429	1	SARS	33	185	307173	306
1430	1	SARS	33	185	305798	303
1431	1	SARS	33	185	303145	301
1432	1	SARS	33	185	301356	300
1433	1	SARS	33	185	289987	288
1434	1	SARS	33	185	312214	311
1435	1	SARS	33	185	297293	297
1436	1	SARS	33	185	288719	288
1437	1	SARS	33	185	306205	306
1438	1	SARS	33	185	289351	288
1439	1	SARS	33	185	28968	288
1440	1	SARS	33	185	313516	312
1441	1	SARS	33	185	300285	300
1442	1	SARS	33	185	287306	287
1443	1	SARS	33	185	29886	297
1444	1	SARS	33	185	290226	291
1445	1	SARS	33	185	290865	289
1446	1	SARS	33	185	290917	291
1447	1	SARS	33	185	292128	292
1448	1	SARS	33	185	305514	305
1449	1	SARS	33	185	309895	307
1450	1	SARS	33	185	29933	299
1451	1	SARS	33	185	313128	311
1452	1	SARS	33	185	303687	302
1453	1	SARS	33	185	297768	294
1454	1	SARS	33	185	292274	291
1455	1	SARS	33	185	297675	297
1456	1	SARS	33	185	301385	297
1457	1	SARS	33	185	289198	288
1458	1	SARS	33	185	303913	303
1459	1	SARS	33	185	311684	312
1460	1	SARS	33	185	296827	294
1461	1	SARS	33	185	300187	299
1462	1	SARS	33	185	300923	301
1463	1	SARS	33	185	298603	297
1464	1	SARS	33	185	286591	286
1465	1	SARS	33	185	302707	302
1466	1	SARS	33	185	299379	299
1467	1	SARS	33	185	28985	289
1468	1	SARS	33	185	29282	292
1469	1	SARS	33	185	299969	300
1470	1	SARS	33	185	301955	301
1471	1	SARS	33	185	308	308
1472	1	SARS	33	185	292454	292
1473	1	SARS	33	185	287194	287
1474	1	SARS	33	185	299856	298
1475	1	SARS	33	185	318165	318
1476	1	SARS	33	185	291459	291
1477	1	SARS	33	185	306283	305
1478	1	SARS	33	185	299847	299
1479	1	SARS	33	185	309053	307
1480	1	SARS	33	185	303585	303
1481	1	SARS	33	185	295958	294
1482	1	SARS	33	185	318403	315
1483	1	SARS	33	185	305642	305
1484	1	SARS	33	185	285443	285
1485	1	SARS	33	185	30646	304
1486	1	SARS	33	185	300122	298
1487	1	SARS	33	185	284328	283
1488	1	SARS	33	185	297607	297
1489	1	SARS	33	185	312636	311
1490	1	SARS	33	185	287137	285
1491	1	SARS	33	185	304658	303
1492	1	SARS	33	185	290223	288
1493	1	SARS	33	185	305069	303
1494	1	SARS	33	185	293077	292
1495	1	SARS	33	185	296905	297
1496	1	SARS	33	185	287602	287
1497	1	SARS	33	185	304467	303
1498	1	SARS	33	185	315709	314
1499	1	SARS	33	185	287062	287
1500	1	SARS	33	185	298244	297
1501	1	SARS	33	185	28833	285
1502	1	SARS	33	185	301556	294
1503	1	SARS	33	185	300485	300
1504	1	SARS	33	185	286611	286
1505	1	SARS	33	185	33488	335
1506	1	SARS	33	185	304172	304
1507	1	SARS	33	185	295716	294
1508	1	SARS	33	185	285248	284
1509	1	SARS	33	185	283094	283
1510	1	SARS	33	185	28896	288
1511	1	SARS	33	185	282215	283
1512	1	SARS	33	185	300448	300
1513	1	SARS	33	185	306138	305
1514	1	SARS	33	185	286483	285
1515	1	SARS	33	185	312491	310
1516	1	SARS	33	185	304646	302
1517	1	SARS	33	185	303356	302
1518	1	SARS	33	185	298367	297
1519	1	SARS	33	185	289809	288
1520	1	SARS	33	185	286014	284
1521	1	SARS	33	185	304227	300
1522	1	SARS	33	185	282912	282
1523	1	SARS	33	185	291514	288
1524	1	SARS	33	185	296746	296
1525	1	SARS	33	185	290322	289
1526	1	SARS	33	185	306361	305
1527	1	SARS	33	185	28851	287
1528	1	SARS	33	185	310788	311
1529	1	SARS	33	185	295641	295
1530	1	SARS	33	185	281635	281
1531	1	SARS	33	185	2971	296
1532	1	SARS	33	185	292255	291
1533	1	SARS	33	185	298372	297
1534	1	SARS	33	185	29317	292
1535	1	SARS	33	185	292932	293
1536	1	SARS	33	185	291691	290
1537	1	SARS	33	185	298228	297
1538	1	SARS	33	185	301201	301
1539	1	SARS	33	185	306971	304
1540	1	SARS	33	185	281479	281
1541	1	SARS	33	185	303587	302
1542	1	SARS	33	185	300684	300
1543	1	SARS	33	185	291461	291
1544	1	SARS	33	185	292922	294
1545	1	SARS	33	185	323456	322
1546	1	SARS	33	185	287778	286
1547	1	SARS	33	185	287745	287
1548	1	SARS	33	185	301019	298
1549	1	SARS	33	185	290601	290
1550	1	SARS	33	185	299532	299
1551	1	SARS	33	185	299033	299
1552	1	SARS	33	185	29121	289
1553	1	SARS	33	185	296539	297
1554	1	SARS	33	185	307747	306
1555	1	SARS	33	185	310895	310
1556	1	SARS	33	185	311851	311
1557	1	SARS	33	185	308811	306
1558	1	SARS	33	185	294017	293
1559	1	SARS	33	185	292619	292
1560	1	SARS	33	185	291352	290
1561	1	SARS	33	185	288177	287
1562	1	SARS	33	185	292246	292
1563	1	SARS	33	185	287684	286
1564	1	SARS	33	185	302303	302
1565	1	SARS	33	185	299079	297
1566	1	SARS	33	185	299699	298
1567	1	SARS	33	185	284149	283
1568	1	SARS	33	185	297916	297
1569	1	SARS	33	185	312342	311
1570	1	SARS	33	185	3024	302
1571	1	SARS	33	185	296879	293
1572	1	SARS	33	185	301335	301
1573	1	SARS	33	185	279327	279
1574	1	SARS	33	185	284368	285
1575	1	SARS	33	185	29956	300
1576	1	SARS	33	185	289972	288
1577	1	SARS	33	185	294851	293
1578	1	SARS	33	185	289968	288
1579	1	SARS	33	185	294793	294
1580	1	SARS	33	185	308162	305
1581	1	SARS	33	185	307896	306
1582	1	SARS	33	185	30723	308
1583	1	SARS	33	185	308801	305
1584	1	SARS	33	185	285097	285
1585	1	SARS	33	185	301658	302
1586	1	SARS	33	185	288528	286
1587	1	SARS	33	185	303503	303
1588	1	SARS	33	185	304956	305
1589	1	SARS	33	185	296717	296
1590	1	SARS	33	185	297833	297
1591	1	SARS	33	185	304655	303
1592	1	SARS	33	185	305052	304
1593	1	SARS	33	185	276597	276
1594	1	SARS	33	185	304672	304
1595	1	SARS	33	185	309247	308
1596	1	SARS	33	185	303259	299
1597	1	SARS	33	185	306362	305
1598	1	SARS	33	185	28225	283
1599	1	SARS	33	185	296055	296
1600	1	SARS	33	185	289642	288
1601	1	SARS	33	185	302452	301
1602	1	SARS	33	185	288627	287
1603	1	SARS	33	185	287353	286
1604	1	SARS	33	185	301258	301
1605	1	SARS	33	185	285766	285
1606	1	SARS	33	185	286796	285
1607	1	SARS	33	185	295886	295
1608	1	SARS	33	185	284326	282
1609	1	SARS	33	185	315004	310
1610	1	SARS	33	185	30732	308
1611	1	SARS	33	185	291929	291
1612	1	SARS	33	185	287013	286
1613	1	SARS	33	185	285843	285
1614	1	SARS	33	185	301701	300
1615	1	SARS	33	185	301791	302
1616	1	SARS	33	185	292962	292
1617	1	SARS	33	185	311	317
1618	1	SARS	33	185	292146	292
1619	1	SARS	33	185	290305	289
1620	1	SARS	33	185	281188	280
1621	1	SARS	33	185	305961	305
1622	1	SARS	33	185	284029	283
1623	1	SARS	33	185	299829	299
1624	1	SARS	33	185	294646	293
1625	1	SARS	33	185	298029	297
1626	1	SARS	33	185	313639	311
1627	1	SARS	33	185	285889	285
1628	1	SARS	33	185	290182	289
1629	1	SARS	33	185	301378	301
1630	1	SARS	33	185	314104	312
1631	1	SARS	33	185	295223	295
1632	1	SARS	33	185	297853	297
1633	1	SARS	33	185	28171	279
1634	1	SARS	33	185	305002	302
1635	1	SARS	33	185	279708	279
1636	1	SARS	33	185	287994	287
1637	1	SARS	33	185	293505	293
1638	1	SARS	33	185	288017	287
1639	1	SARS	33	185	284988	284
1640	1	SARS	33	185	307046	305
1641	1	SARS	33	185	284605	285
1642	1	SARS	33	185	295857	291
1643	1	SARS	33	185	286042	285
1644	1	SARS	33	185	299392	299
1645	1	SARS	33	185	299668	298
1646	1	SARS	33	185	282727	282
1647	1	SARS	33	185	297317	296
1648	1	SARS	33	185	290241	288
1649	1	SARS	33	185	291145	291
1650	1	SARS	33	185	286045	285
1651	1	SARS	33	185	309481	308
1652	1	SARS	33	185	300366	298
1653	1	SARS	33	185	292022	294
1654	1	SARS	33	185	28603	285
1655	1	SARS	33	185	292843	293
1656	1	SARS	33	185	291118	292
1657	1	SARS	33	185	27993	279
1658	1	SARS	33	185	293987	294
1659	1	SARS	33	185	28873	288
1660	1	SARS	33	185	287832	288
1661	1	SARS	33	185	293456	293
1662	1	SARS	33	185	285492	285
1663	1	SARS	33	185	305425	304
1664	1	SARS	33	185	279862	278
1665	1	SARS	33	185	282431	281
1666	1	SARS	33	185	276893	276
1667	1	SARS	33	185	294532	293
1668	1	SARS	33	185	295055	294
1669	1	SARS	33	185	28275	283
1670	1	SARS	33	185	293575	293
1671	1	SARS	33	185	291663	291
1672	1	SARS	33	185	291618	291
1673	1	SARS	33	185	293401	292
1674	1	SARS	33	185	291211	291
1675	1	SARS	33	185	303401	303
1676	1	SARS	33	185	293262	292
1677	1	SARS	33	185	296953	296
1678	1	SARS	33	185	292359	291
1679	1	SARS	33	185	304124	304
1680	1	SARS	33	185	295083	295
1681	1	SARS	33	185	293518	292
1682	1	SARS	33	185	300022	299
1683	1	SARS	33	185	299442	299
1684	1	SARS	33	185	29266	292
1685	1	SARS	33	185	287503	287
1686	1	SARS	33	185	299047	298
1687	1	SARS	33	185	284916	284
1688	1	SARS	33	185	292805	291
1689	1	SARS	33	185	281134	280
1690	1	SARS	33	185	28475	285
1691	1	SARS	33	185	279218	278
1692	1	SARS	33	185	300179	298
1693	1	SARS	33	185	292663	292
1694	1	SARS	33	185	304113	302
1695	1	SARS	33	185	277974	278
1696	1	SARS	33	185	282479	281
1697	1	SARS	33	185	286336	286
1698	1	SARS	33	185	290688	291
1699	1	SARS	33	185	282052	282
1700	1	SARS	33	185	28347	283
1701	1	SARS	33	185	285562	285
1702	1	SARS	33	185	287604	287
1703	1	SARS	33	185	301875	301
1704	1	SARS	33	185	294581	294
1705	1	SARS	33	185	284241	284
1706	1	SARS	33	185	29571	294
1707	1	SARS	33	185	290196	289
1708	1	SARS	33	185	287444	288
1709	1	SARS	33	185	29176	289
1710	1	SARS	33	185	285738	285
1711	1	SARS	33	185	287604	286
1712	1	SARS	33	185	300685	298
1713	1	SARS	33	185	298927	298
1714	1	SARS	33	185	288371	287
1715	1	SARS	33	185	279254	277
1716	1	SARS	33	185	283955	284
1717	1	SARS	33	185	290784	291
1718	1	SARS	33	185	309793	310
1719	1	SARS	33	185	294604	295
1720	1	SARS	33	185	295985	295
1721	1	SARS	33	185	287973	286
1722	1	SARS	33	185	304305	304
1723	1	SARS	33	185	296523	293
1724	1	SARS	33	185	296258	294
1725	1	SARS	33	185	284356	285
1726	1	SARS	33	185	309359	309
1727	1	SARS	33	186	335321	334
1728	1	SARS	33	186	334846	334
1729	1	SARS	33	186	305	305
1730	1	SARS	33	186	320925	320
1731	1	SARS	33	186	343452	340
1732	1	SARS	33	186	32858	328
1733	1	SARS	33	186	336954	334
1734	1	SARS	33	186	341361	341
1735	1	SARS	33	186	342	341
1736	1	SARS	33	186	336839	337
1737	1	SARS	33	186	3423	344
1738	1	SARS	33	186	329849	327
1739	1	SARS	33	186	330777	329
1740	1	SARS	33	186	341375	342
1741	1	SARS	33	186	317307	314
1742	1	SARS	33	186	327742	326
1743	1	SARS	33	186	352246	349
1744	1	SARS	33	186	337739	338
1745	1	SARS	33	186	3105	312
1746	1	SARS	33	186	311546	310
1747	1	SARS	33	186	324266	324
1748	1	SARS	33	186	319297	318
1749	1	SARS	33	186	337484	338
1750	1	SARS	33	186	319074	319
1751	1	SARS	33	186	319452	320
1752	1	SARS	33	186	333738	332
1753	1	SARS	33	186	335157	332
1754	1	SARS	33	186	338585	337
1755	1	SARS	33	186	334475	334
1756	1	SARS	33	186	37458	343
1757	1	SARS	33	186	333114	332
1758	1	SARS	33	186	339826	338
1759	1	SARS	33	186	337	337
1760	1	SARS	33	186	330032	329
1761	1	SARS	33	186	340223	339
1762	1	SARS	33	186	316643	318
1763	1	SARS	33	186	31973	317
1764	1	SARS	33	186	343829	343
1765	1	SARS	33	186	352605	351
1766	1	SARS	33	186	332077	331
1767	1	SARS	33	186	315667	314
1768	1	SARS	33	186	335692	335
1769	1	SARS	33	186	348	348
1770	1	SARS	33	186	328333	329
1771	1	SARS	33	186	305834	304
1772	1	SARS	33	186	323045	322
1773	1	SARS	33	186	318278	317
1774	1	SARS	33	186	333792	333
1775	1	SARS	33	186	345982	341
1776	1	SARS	33	186	337367	334
1777	1	SARS	33	186	321694	321
1778	1	SARS	33	186	324333	327
1779	1	SARS	33	186	31544	314
1780	1	SARS	33	186	339604	338
1781	1	SARS	33	186	323921	322
1782	1	SARS	33	186	337848	332
1783	1	SARS	33	186	33095	330
1784	1	SARS	33	186	316129	316
1785	1	SARS	33	186	346786	344
1786	1	SARS	33	186	345677	345
1787	1	SARS	33	186	335534	335
1788	1	SARS	33	186	313462	310
1789	1	SARS	33	186	331737	330
1790	1	SARS	33	186	335961	334
1791	1	SARS	33	186	325056	323
1792	1	SARS	33	186	300962	301
1793	1	SARS	33	186	333913	332
1794	1	SARS	33	186	34116	339
1795	1	SARS	33	186	331384	330
1796	1	SARS	33	186	307977	306
1797	1	SARS	33	186	321894	321
1798	1	SARS	33	186	346861	346
1799	1	SARS	33	186	333095	330
1800	1	SARS	33	186	312362	311
1801	1	SARS	33	186	332484	329
1802	1	SARS	33	186	318512	317
1803	1	SARS	33	186	319088	318
1804	1	SARS	33	186	32994	330
1805	1	SARS	33	186	343068	343
1806	1	SARS	33	186	317262	316
1807	1	SARS	33	186	32756	324
1808	1	SARS	33	186	328708	328
1809	1	SARS	33	186	334773	330
1810	1	SARS	33	186	337686	332
1811	1	SARS	33	186	3251	324
1812	1	SARS	33	186	310681	310
1813	1	SARS	33	186	326692	327
1814	1	SARS	33	186	32657	326
1815	1	SARS	33	186	318698	316
1816	1	SARS	33	186	313063	312
1817	1	SARS	33	186	32079	320
1818	1	SARS	33	186	304009	305
1819	1	SARS	33	186	309523	307
1820	1	SARS	33	186	306744	306
1821	1	SARS	33	186	333042	332
1822	1	SARS	33	186	302106	302
1823	1	SARS	33	186	324486	321
1824	1	SARS	33	186	333422	331
1825	1	SARS	33	186	303684	304
1826	1	SARS	33	186	320699	320
1827	1	SARS	33	186	309831	310
1828	1	SARS	33	186	31748	317
1829	1	SARS	33	186	307578	308
1830	1	SARS	33	186	312621	311
1831	1	SARS	33	186	295031	293
1832	1	SARS	33	186	322881	322
1833	1	SARS	33	186	33697	337
1834	1	SARS	33	186	328884	326
1835	1	SARS	33	186	327308	326
1836	1	SARS	33	186	326956	323
1837	1	SARS	33	186	306578	303
1838	1	SARS	33	186	332867	330
1839	1	SARS	33	186	319803	318
1840	1	SARS	33	186	319561	319
1841	1	SARS	33	186	330717	328
1842	1	SARS	33	186	351684	352
1843	1	SARS	33	186	341189	341
1844	1	SARS	33	186	329289	327
1845	1	SARS	33	186	322791	320
1846	1	SARS	33	186	333141	331
1847	1	SARS	33	186	312	310
1848	1	SARS	33	186	31071	309
1849	1	SARS	33	186	318791	316
1850	1	SARS	33	186	313647	313
1851	1	SARS	33	186	321081	319
1852	1	SARS	33	186	331494	330
1853	1	SARS	33	186	34698	346
1854	1	SARS	33	186	362736	358
1855	1	SARS	33	186	3293	328
1856	1	SARS	33	186	313	313
1857	1	SARS	33	186	342364	341
1858	1	SARS	33	186	343648	344
1859	1	SARS	33	186	333668	332
1860	1	SARS	33	186	346839	348
1861	1	SARS	33	186	331356	331
1862	1	SARS	33	186	345901	345
1863	1	SARS	33	186	343785	343
1864	1	SARS	33	186	305991	305
1865	1	SARS	33	186	327355	326
1866	1	SARS	33	186	330131	327
1867	1	SARS	33	186	299842	300
1868	1	SARS	33	186	335572	332
1869	1	SARS	33	186	333843	329
1870	1	SARS	33	186	327889	326
1871	1	SARS	33	186	321063	320
1872	1	SARS	33	186	31013	309
1873	1	SARS	33	186	343143	343
1874	1	SARS	33	186	324785	323
1875	1	SARS	33	186	323545	322
1876	1	SARS	33	186	335312	334
1877	1	SARS	33	186	329473	329
1878	1	SARS	33	186	314175	313
1879	1	SARS	33	186	330206	328
1880	1	SARS	33	186	309352	305
1881	1	SARS	33	186	353333	351
1882	1	SARS	33	186	296513	296
1883	1	SARS	33	186	310049	309
1884	1	SARS	33	186	354845	353
1885	1	SARS	33	186	297111	295
1886	1	SARS	33	186	346908	345
1887	1	SARS	33	186	329328	328
1888	1	SARS	33	186	324817	320
1889	1	SARS	33	186	310022	310
1890	1	SARS	33	186	337573	337
1891	1	SARS	33	186	345172	346
1892	1	SARS	33	186	337981	337
1893	1	SARS	33	186	320303	318
1894	1	SARS	33	186	288309	287
1895	1	SARS	33	186	321802	320
1896	1	SARS	33	186	306781	306
1897	1	SARS	33	186	289769	288
1898	1	SARS	33	186	319896	319
1899	1	SARS	33	186	293041	292
1900	1	SARS	33	186	334569	334
1901	1	SARS	33	186	315992	315
1902	1	SARS	33	186	323833	322
1903	1	SARS	33	186	336618	334
1904	1	SARS	33	186	32543	324
1905	1	SARS	33	186	322709	322
1906	1	SARS	33	186	327037	324
1907	1	SARS	33	186	328387	326
1908	1	SARS	33	186	329072	328
1909	1	SARS	33	186	351562	351
1910	1	SARS	33	186	321594	322
1911	1	SARS	33	186	33898	336
1912	1	SARS	33	186	326349	326
1913	1	SARS	33	186	311202	309
1914	1	SARS	33	186	310676	309
1915	1	SARS	33	186	320609	319
1916	1	SARS	33	186	328106	325
1917	1	SARS	33	186	313582	313
1918	1	SARS	33	186	304613	304
1919	1	SARS	33	186	337507	338
1920	1	SARS	33	186	337351	336
1921	1	SARS	33	186	306219	306
1922	1	SARS	33	186	314273	312
1923	1	SARS	33	186	338955	338
1924	1	SARS	33	186	326114	325
1925	1	SARS	33	186	338721	339
1926	1	SARS	33	186	3645	361
1927	1	SARS	33	186	321	321
1928	1	SARS	33	186	324011	323
1929	1	SARS	33	186	310777	309
1930	1	SARS	33	186	319708	318
1931	1	SARS	33	186	336961	337
1932	1	SARS	33	186	351783	350
1933	1	SARS	33	186	335546	331
1934	1	SARS	33	186	315748	314
1935	1	SARS	33	186	312928	311
1936	1	SARS	33	186	318693	319
1937	1	SARS	33	186	340562	340
1938	1	SARS	33	186	345719	344
1939	1	SARS	33	186	346803	345
1940	1	SARS	33	186	322817	321
1941	1	SARS	33	186	373	373
1942	1	SARS	33	186	345637	343
1943	1	SARS	33	186	349215	348
1944	1	SARS	33	186	296346	295
1945	1	SARS	33	186	351707	353
1946	1	SARS	33	186	323454	321
1947	1	SARS	33	186	329357	329
1948	1	SARS	33	186	315603	313
1949	1	SARS	33	186	356328	355
1950	1	SARS	33	186	338281	338
1951	1	SARS	33	186	325276	324
1952	1	SARS	33	186	316646	317
1953	1	SARS	33	186	328155	325
1954	1	SARS	33	186	33703	336
1955	1	SARS	33	186	318663	318
1956	1	SARS	33	186	336969	337
1957	1	SARS	33	186	354766	354
1958	1	SARS	33	186	326114	324
1959	1	SARS	33	186	307336	305
1960	1	SARS	33	186	310096	309
1961	1	SARS	33	186	322202	320
1962	1	SARS	33	186	330734	329
1963	1	SARS	33	186	341249	337
1964	1	SARS	33	186	314153	312
1965	1	SARS	33	186	349568	346
1966	1	SARS	33	186	321663	321
1967	1	SARS	33	186	35342	355
1968	1	SARS	33	186	305124	304
1969	1	SARS	33	186	329146	329
1970	1	SARS	33	186	350389	346
1971	1	SARS	33	186	310739	310
1972	1	SARS	33	186	343132	342
1973	1	SARS	33	186	344917	343
1974	1	SARS	33	186	31905	318
1975	1	SARS	33	186	341641	339
1976	1	SARS	33	186	311012	309
1977	1	SARS	33	186	333689	332
1978	1	SARS	33	186	324543	323
1979	1	SARS	33	186	337752	332
1980	1	SARS	33	186	344339	340
1981	1	SARS	33	186	328629	327
1982	1	SARS	33	186	332	331
1983	1	SARS	33	186	318764	317
1984	1	SARS	33	186	353566	354
1985	1	SARS	33	186	312751	312
1986	1	SARS	33	186	304854	303
1987	1	SARS	33	186	326232	326
1988	1	SARS	33	186	324264	324
1989	1	SARS	33	186	317105	314
1990	1	SARS	33	186	325816	325
1991	1	SARS	33	186	314662	315
1992	1	SARS	33	186	319158	314
1993	1	SARS	33	186	333375	330
1994	1	SARS	33	186	328896	327
1995	1	SARS	33	186	309251	308
1996	1	SARS	33	186	324685	323
1997	1	SARS	33	186	320224	319
1998	1	SARS	33	186	328731	328
[truncated: 244,648+ more rows]

## Sheet: S1a and S1b Figs
hpi	virus	temperature	donor	replicate	titer
48	mock	33	1	1	1
48	mock	33	2	1	1
48	mock	33	3	1	1
48	mock	33	1	2	1
48	mock	33	2	2	1
48	mock	33	3	2	1
48	SARS	33	1	1	1
48	SARS	33	2	1	1
48	SARS	33	3	1	1
48	SARS	33	1	2	1
48	SARS	33	2	2	1
48	SARS	33	3	2	1
48	SARS-2	33	1	1	1
48	SARS-2	33	2	1	1
48	SARS-2	33	3	1	1
48	SARS-2	33	1	2	1
48	SARS-2	33	2	2	1
48	SARS-2	33	3	2	1
48	mock	37	1	1	1
48	mock	37	2	1	1
48	mock	37	3	1	1
48	mock	37	1	2	1
48	mock	37	2	2	1
48	mock	37	3	2	1
48	SARS	37	1	1	120
48	SARS	37	2	1	1
48	SARS	37	3	1	1
48	SARS	37	1	2	240
48	SARS	37	2	2	1
48	SARS	37	3	2	1
48	SARS-2	37	1	1	1
48	SARS-2	37	2	1	1
48	SARS-2	37	3	1	1
48	SARS-2	37	1	2	1
48	SARS-2	37	2	2	1
48	SARS-2	37	3	2	1
72	mock	33	1	1	1
72	mock	33	2	1	1
72	mock	33	3	1	1
72	mock	33	1	2	1
72	mock	33	2	2	1
72	mock	33	3	2	1
72	SARS	33	1	1	1
72	SARS	33	2	1	1
72	SARS	33	3	1	1
72	SARS	33	1	2	160
72	SARS	33	2	2	1
72	SARS	33	3	2	1
72	SARS-2	33	1	1	80
72	SARS-2	33	2	1	1
72	SARS-2	33	3	1	120
72	SARS-2	33	1	2	200
72	SARS-2	33	2	2	1
72	SARS-2	33	3	2	320
72	mock	37	1	1	1
72	mock	37	2	1	1
72	mock	37	3	1	1
72	mock	37	1	2	1
72	mock	37	2	2	1
72	mock	37	3	2	1
72	SARS	37	1	1	360
72	SARS	37	2	1	1
72	SARS	37	3	1	1
72	SARS	37	1	2	280
72	SARS	37	2	2	1
72	SARS	37	3	2	1
72	SARS-2	37	1	1	1
72	SARS-2	37	2	1	1
72	SARS-2	37	3	1	40
72	SARS-2	37	1	2	40
72	SARS-2	37	2	2	80
72	SARS-2	37	3	2	1
96	mock	33	1	1	1
96	mock	33	2	1	1
96	mock	33	3	1	1
96	mock	33	1	2	1
96	mock	33	2	2	1
96	mock	33	3	2	1
96	SARS	33	1	1	1
96	SARS	33	2	1	1
96	SARS	33	3	1	1
96	SARS	33	1	2	440
96	SARS	33	2	2	1
96	SARS	33	3	2	1
96	SARS-2	33	1	1	120
96	SARS-2	33	2	1	1
96	SARS-2	33	3	1	1
96	SARS-2	33	1	2	640
96	SARS-2	33	2	2	1
96	SARS-2	33	3	2	160
96	mock	37	1	1	1
96	mock	37	2	1	1
96	mock	37	3	1	80
96	mock	37	1	2	1
96	mock	37	2	2	1
96	mock	37	3	2	1
96	SARS	37	1	1	360
96	SARS	37	2	1	40
96	SARS	37	3	1	40
96	SARS	37	1	2	480
96	SARS	37	2	2	40
96	SARS	37	3	2	1
96	SARS-2	37	1	1	1
96	SARS-2	37	2	1	1
96	SARS-2	37	3	1	1
96	SARS-2	37	1	2	1
96	SARS-2	37	2	2	1
96	SARS-2	37	3	2	1

## Sheet: Fig 2a
hpi	virus	temperature	donor	treatment	sample	replicate	titer
1	SARS2	33	1	T1	Apical	1	120
1	SARS2	33	1	T1	Apical	2	80
1	SARS2	37	1	T1	Apical	1	80
1	SARS2	37	1	T1	Apical	2	1
1	SARS	33	1	T1	Apical	1	800
1	SARS	33	1	T1	Apical	2	400
1	SARS	37	1	T1	Apical	1	800
1	SARS	37	1	T1	Apical	2	800
24	SARS2	33	1	T1	Apical	1	40
24	SARS2	33	1	T1	Apical	2	1
24	SARS2	37	1	T1	Apical	1	1
24	SARS2	37	1	T1	Apical	2	1
24	SARS	33	1	T1	Apical	1	1
24	SARS	33	1	T1	Apical	2	120
24	SARS	37	1	T1	Apical	1	1
24	SARS	37	1	T1	Apical	2	1
48	SARS2	33	1	T1	Apical	1	1
48	SARS2	33	1	T1	Apical	2	1
48	SARS2	37	1	T1	Apical	1	1
48	SARS2	37	1	T1	Apical	2	1
48	SARS	33	1	T1	Apical	1	1
48	SARS	33	1	T1	Apical	2	1
48	SARS	37	1	T1	Apical	1	1
48	SARS	37	1	T1	Apical	2	1
72	SARS2	33	1	T1	Apical	1	1
72	SARS2	33	1	T1	Apical	2	1
72	SARS2	37	1	T1	Apical	1	1
72	SARS2	37	1	T1	Apical	2	1
72	SARS	33	1	T1	Apical	1	1
72	SARS	33	1	T1	Apical	2	1
72	SARS	37	1	T1	Apical	1	1
72	SARS	37	1	T1	Apical	2	1
1	SARS2	33	1	T3	Apical	1	400
1	SARS2	33	1	T3	Apical	2	1
1	SARS2	37	1	T3	Apical	1	40
1	SARS2	37	1	T3	Apical	2	160
1	SARS	33	1	T3	Apical	1	400
1	SARS	33	1	T3	Apical	2	800
1	SARS	37	1	T3	Apical	1	1200
1	SARS	37	1	T3	Apical	2	800
24	SARS2	33	1	T3	Apical	1	1
24	SARS2	33	1	T3	Apical	2	1
24	SARS2	37	1	T3	Apical	1	1
24	SARS2	37	1	T3	Apical	2	1
24	SARS	33	1	T3	Apical	1	1
24	SARS	33	1	T3	Apical	2	1
24	SARS	37	1	T3	Apical	1	1
24	SARS	37	1	T3	Apical	2	1
48	SARS2	33	1	T3	Apical	1	1
48	SARS2	33	1	T3	Apical	2	1
48	SARS2	37	1	T3	Apical	1	1
48	SARS2	37	1	T3	Apical	2	1
48	SARS	33	1	T3	Apical	1	1
48	SARS	33	1	T3	Apical	2	1
48	SARS	37	1	T3	Apical	1	1
48	SARS	37	1	T3	Apical	2	1
72	SARS2	33	1	T3	Apical	1	1
72	SARS2	33	1	T3	Apical	2	1
72	SARS2	37	1	T3	Apical	1	1
72	SARS2	37	1	T3	Apical	2	1
72	SARS	33	1	T3	Apical	1	1
72	SARS	33	1	T3	Apical	2	1
72	SARS	37	1	T3	Apical	1	1
72	SARS	37	1	T3	Apical	2	1
1	SARS2	33	1	N	Apical	1	40
1	SARS2	33	1	N	Apical	2	40
1	SARS2	37	1	N	Apical	1	40
1	SARS2	37	1	N	Apical	2	80
1	SARS	33	1	N	Apical	1	120
1	SARS	33	1	N	Apical	2	80
1	SARS	37	1	N	Apical	1	800
1	SARS	37	1	N	Apical	2	1
24	SARS2	33	1	N	Apical	1	1
24	SARS2	33	1	N	Apical	2	160
24	SARS2	37	1	N	Apical	1	160
24	SARS2	37	1	N	Apical	2	1
24	SARS	33	1	N	Apical	1	400
24	SARS	33	1	N	Apical	2	40
24	SARS	37	1	N	Apical	1	1
24	SARS	37	1	N	Apical	2	1
48	SARS2	33	1	N	Apical	1	2800
48	SARS2	33	1	N	Apical	2	1200
48	SARS2	37	1	N	Apical	1	3600
48	SARS2	37	1	N	Apical	2	40
48	SARS	33	1	N	Apical	1	880
48	SARS	33	1	N	Apical	2	240
48	SARS	37	1	N	Apical	1	400
48	SARS	37	1	N	Apical	2	1
72	SARS2	33	1	N	Apical	1	44000
72	SARS2	33	1	N	Apical	2	44000
72	SARS2	37	1	N	Apical	1	16000
72	SARS2	37	1	N	Apical	2	2400
72	SARS	33	1	N	Apical	1	6400
72	SARS	33	1	N	Apical	2	1600
72	SARS	37	1	N	Apical	1	800
72	SARS	37	1	N	Apical	2	400
1	SARS2	33	2	T1	Apical	1	320
1	SARS2	33	2	T1	Apical	2	480
1	SARS2	37	2	T1	Apical	1	160
1	SARS2	37	2	T1	Apical	2	160
1	SARS	33	2	T1	Apical	1	160
1	SARS	33	2	T1	Apical	2	200
1	SARS	37	2	T1	Apical	1	1
1	SARS	37	2	T1	Apical	2	520
24	SARS2	33	2	T1	Apical	1	1
24	SARS2	33	2	T1	Apical	2	1
24	SARS2	37	2	T1	Apical	1	1
24	SARS2	37	2	T1	Apical	2	1
24	SARS	33	2	T1	Apical	1	40
24	SARS	33	2	T1	Apical	2	1
24	SARS	37	2	T1	Apical	1	40
24	SARS	37	2	T1	Apical	2	1
48	SARS2	33	2	T1	Apical	1	1
48	SARS2	33	2	T1	Apical	2	1
48	SARS2	37	2	T1	Apical	1	1
48	SARS2	37	2	T1	Apical	2	1
48	SARS	33	2	T1	Apical	1	1
48	SARS	33	2	T1	Apical	2	1
48	SARS	37	2	T1	Apical	1	1
48	SARS	37	2	T1	Apical	2	1
72	SARS2	33	2	T1	Apical	1	1
72	SARS2	33	2	T1	Apical	2	1
72	SARS2	37	2	T1	Apical	1	1
72	SARS2	37	2	T1	Apical	2	1
72	SARS	33	2	T1	Apical	1	1
72	SARS	33	2	T1	Apical	2	1
72	SARS	37	2	T1	Apical	1	1
72	SARS	37	2	T1	Apical	2	1
1	SARS2	33	2	T3	Apical	1	40
1	SARS2	33	2	T3	Apical	2	1
1	SARS2	37	2	T3	Apical	1	1
1	SARS2	37	2	T3	Apical	2	1
1	SARS	33	2	T3	Apical	1	800
1	SARS	33	2	T3	Apical	2	1
1	SARS	37	2	T3	Apical	1	360
1	SARS	37	2	T3	Apical	2	400
24	SARS2	33	2	T3	Apical	1	1
24	SARS2	33	2	T3	Apical	2	1
24	SARS2	37	2	T3	Apical	1	1
24	SARS2	37	2	T3	Apical	2	1
24	SARS	33	2	T3	Apical	1	80
24	SARS	33	2	T3	Apical	2	160
24	SARS	37	2	T3	Apical	1	1
24	SARS	37	2	T3	Apical	2	1
48	SARS2	33	2	T3	Apical	1	1
48	SARS2	33	2	T3	Apical	2	1
48	SARS2	37	2	T3	Apical	1	1
48	SARS2	37	2	T3	Apical	2	1
48	SARS	33	2	T3	Apical	1	1
48	SARS	33	2	T3	Apical	2	1
48	SARS	37	2	T3	Apical	1	1
48	SARS	37	2	T3	Apical	2	1
72	SARS2	33	2	T3	Apical	1	1
72	SARS2	33	2	T3	Apical	2	1
72	SARS2	37	2	T3	Apical	1	1
72	SARS2	37	2	T3	Apical	2	1
72	SARS	33	2	T3	Apical	1	1
72	SARS	33	2	T3	Apical	2	40
72	SARS	37	2	T3	Apical	1	1
72	SARS	37	2	T3	Apical	2	1
1	SARS2	33	2	N	Apical	1	80
1	SARS2	33	2	N	Apical	2	400
1	SARS2	37	2	N	Apical	1	320
1	SARS2	37	2	N	Apical	2	120
1	SARS	33	2	N	Apical	1	760
1	SARS	33	2	N	Apical	2	400
1	SARS	37	2	N	Apical	1	440
1	SARS	37	2	N	Apical	2	240
24	SARS2	33	2	N	Apical	1	1
24	SARS2	33	2	N	Apical	2	120
24	SARS2	37	2	N	Apical	1	360
24	SARS2	37	2	N	Apical	2	1
24	SARS	33	2	N	Apical	1	1
24	SARS	33	2	N	Apical	2	160
24	SARS	37	2	N	Apical	1	320
24	SARS	37	2	N	Apical	2	80
48	SARS2	33	2	N	Apical	1	3200
48	SARS2	33	2	N	Apical	2	2800
48	SARS2	37	2	N	Apical	1	2800
48	SARS2	37	2	N	Apical	2	320
48	SARS	33	2	N	Apical	1	1200
48	SARS	33	2	N	Apical	2	1600
48	SARS	37	2	N	Apical	1	6000
48	SARS	37	2	N	Apical	2	3600
72	SARS2	33	2	N	Apical	1	4000
72	SARS2	33	2	N	Apical	2	48000
72	SARS2	37	2	N	Apical	1	44000
72	SARS2	37	2	N	Apical	2	5600
72	SARS	33	2	N	Apical	1	24000
72	SARS	33	2	N	Apical	2	8000
72	SARS	37	2	N	Apical	1	40000
72	SARS	37	2	N	Apical	2	8000
1	SARS2	33	3	T1	Apical	1	1
1	SARS2	33	3	T1	Apical	2	40
1	SARS2	37	3	T1	Apical	1	40
1	SARS2	37	3	T1	Apical	2	1
1	SARS	33	3	T1	Apical	1	240
1	SARS	33	3	T1	Apical	2	40
1	SARS	37	3	T1	Apical	1	360
1	SARS	37	3	T1	Apical	2	400
24	SARS2	33	3	T1	Apical	1	40
24	SARS2	33	3	T1	Apical	2	1
24	SARS2	37	3	T1	Apical	1	1
24	SARS2	37	3	T1	Apical	2	1
24	SARS	33	3	T1	Apical	1	80
24	SARS	33	3	T1	Apical	2	1
24	SARS	37	3	T1	Apical	1	40
24	SARS	37	3	T1	Apical	2	80
0	SARS	37	In_1	T1	Apical	1	320000
0	SARS2	37	In_1	T1	Apical	1	40000
0	SARS	33	In_1	T1	Apical	1	320000
0	SARS2	33	In_1	T1	Apical	1	40000
48	SARS2	33	In_1	T1	Apical	1	1
48	SARS2	33	In_1	T1	Apical	2	1
48	SARS2	37	In_1	T1	Apical	1	1
48	SARS2	37	In_1	T1	Apical	2	1
48	SARS	33	In_1	T1	Apical	1	1
48	SARS	33	In_1	T1	Apical	2	1
48	SARS	37	In_1	T1	Apical	1	1
48	SARS	37	In_1	T1	Apical	2	1
72	SARS2	33	In_1	T1	Apical	1	1600
72	SARS2	33	In_1	T1	Apical	2	1
72	SARS2	37	In_1	T1	Apical	1	1
72	SARS2	37	In_1	T1	Apical	2	1
72	SARS	33	In_1	T1	Apical	1	1
72	SARS	33	In_1	T1	Apical	2	40
72	SARS	37	In_1	T1	Apical	1	1
72	SARS	37	In_1	T1	Apical	2	1
1	SARS2	33	In_1	T3	Apical	1	80
1	SARS2	33	In_1	T3	Apical	2	80
1	SARS2	37	In_1	T3	Apical	1	40
1	SARS2	37	In_1	T3	Apical	2	40
1	SARS	33	In_1	T3	Apical	1	120
1	SARS	33	In_1	T3	Apical	2	360
1	SARS	37	In_1	T3	Apical	1	480
1	SARS	37	In_1	T3	Apical	2	80
24	SARS2	33	In_1	T3	Apical	1	1
24	SARS2	33	In_1	T3	Apical	2	1
24	SARS2	37	In_1	T3	Apical	1	1
24	SARS2	37	In_1	T3	Apical	2	1
24	SARS	33	In_1	T3	Apical	1	40
24	SARS	33	In_1	T3	Apical	2	40
24	SARS	37	In_1	T3	Apical	1	1
24	SARS	37	In_1	T3	Apical	2	1
0	SARS	37	In_1	T3	Apical	1	320000
0	SARS2	37	In_1	T3	Apical	1	40000
0	SARS	33	In_1	T3	Apical	1	320000
0	SARS2	33	In_1	T3	Apical	1	40000
48	SARS2	33	In_1	T3	Apical	1	1
48	SARS2	33	In_1	T3	Apical	2	1
48	SARS2	37	In_1	T3	Apical	1	1
48	SARS2	37	In_1	T3	Apical	2	1
48	SARS	33	In_1	T3	Apical	1	1
48	SARS	33	In_1	T3	Apical	2	1
48	SARS	37	In_1	T3	Apical	1	1
48	SARS	37	In_1	T3	Apical	2	1
72	SARS2	33	In_1	T3	Apical	1	1
72	SARS2	33	In_1	T3	Apical	2	1
72	SARS2	37	In_1	T3	Apical	1	1
72	SARS2	37	In_1	T3	Apical	2	1
72	SARS	33	In_1	T3	Apical	1	40
72	SARS	33	In_1	T3	Apical	2	1
72	SARS	37	In_1	T3	Apical	1	40
72	SARS	37	In_1	T3	Apical	2	1
1	SARS2	33	In_1	N	Apical	1	80
1	SARS2	33	In_1	N	Apical	2	400
1	SARS2	37	In_1	N	Apical	1	1
1	SARS2	37	In_1	N	Apical	2	80
1	SARS	33	In_1	N	Apical	1	160
1	SARS	33	In_1	N	Apical	2	400
1	SARS	37	In_1	N	Apical	1	160
1	SARS	37	In_1	N	Apical	2	1
24	SARS2	33	In_1	N	Apical	1	1
24	SARS2	33	In_1	N	Apical	2	120
24	SARS2	37	In_1	N	Apical	1	1
24	SARS2	37	In_1	N	Apical	2	1
24	SARS	33	In_1	N	Apical	1	1
24	SARS	33	In_1	N	Apical	2	120
24	SARS	37	In_1	N	Apical	1	80
24	SARS	37	In_1	N	Apical	2	160
0	SARS	37	In_1	N	Apical	1	320000
0	SARS2	37	In_1	N	Apical	1	40000
0	SARS	33	In_1	N	Apical	1	320000
0	SARS2	33	In_1	N	Apical	1	40000
48	SARS2	33	3	N	Apical	1	520
48	SARS2	33	3	N	Apical	2	1080
48	SARS2	37	3	N	Apical	1	360
48	SARS2	37	3	N	Apical	2	440
48	SARS	33	3	N	Apical	1	1200
48	SARS	33	3	N	Apical	2	800
48	SARS	37	3	N	Apical	1	40
48	SARS	37	3	N	Apical	2	120
72	SARS2	33	3	N	Apical	1	11200
72	SARS2	33	3	N	Apical	2	60000
72	SARS2	37	3	N	Apical	1	8000
72	SARS2	37	3	N	Apical	2	12000
72	SARS	33	3	N	Apical	1	2000
72	SARS	33	3	N	Apical	2	400
72	SARS	37	3	N	Apical	1	400
72	SARS	37	3	N	Apical	2	400

## Sheet: Fig 2b
hpi	virus	temperature	donor	treatment	titer
0	SARS	33	In_1	N	2000000
0	SARS	33	In_1	T1	4000000
0	SARS	33	In_1	T3	2000000
0	SARS2	33	In_1	N	200000
0	SARS2	33	In_1	T1	200000
0	SARS2	33	In_1	T3	880000
0	SARS	37	In_1	N	2000000
0	SARS	37	In_1	T1	4000000
0	SARS	37	In_1	T3	2000000
0	SARS2	37	In_1	N	200000
0	SARS2	37	In_1	T1	200000
0	SARS2	37	In_1	T3	880000
1	SARS	37	3	N	2800
1	SARS	37	3	T1	7200
1	SARS	37	3	T3	3200
24	SARS	37	3	N	600
24	SARS	37	3	T1	240
24	SARS	37	3	T3	240
48	SARS	37	3	N	8000
48	SARS	37	3	T1	360
48	SARS	37	3	T3	1
72	SARS	37	3	N	72000
72	SARS	37	3	T1	1120
72	SARS	37	3	T3	1
1	SARS	33	1	N	1120
1	SARS	33	1	T1	200
1	SARS	33	1	T3	400
24	SARS	33	1	N	240
24	SARS	33	1	T1	160
24	SARS	33	1	T3	120
48	SARS	33	1	N	40
48	SARS	33	1	T1	120
48	SARS	33	1	T3	1
72	SARS	33	1	N	1080
72	SARS	33	1	T1	1
72	SARS	33	1	T3	1
1	SARS2	33	1	N	240
1	SARS2	33	1	T1	240
1	SARS2	33	1	T3	240
24	SARS2	33	1	N	120
24	SARS2	33	1	T1	1
24	SARS2	33	1	T3	1
48	SARS2	33	1	N	4400
48	SARS2	33	1	T1	1
48	SARS2	33	1	T3	240
72	SARS2	33	1	N	120000
72	SARS2	33	1	T1	1520
72	SARS2	33	1	T3	5600
1	SARS	37	1	N	1520
1	SARS	37	1	T1	3200
1	SARS	37	1	T3	2400
24	SARS	37	1	N	280
24	SARS	37	1	T1	160
24	SARS	37	1	T3	320
48	SARS	37	1	N	2800
48	SARS	37	1	T1	1
48	SARS	37	1	T3	120
72	SARS	37	1	N	13200
72	SARS	37	1	T1	1
72	SARS	37	1	T3	1
1	SARS2	37	1	N	240
1	SARS2	37	1	T1	360
1	SARS2	37	1	T3	280
24	SARS2	37	1	N	240
24	SARS2	37	1	T1	1
24	SARS2	37	1	T3	1
48	SARS2	37	1	N	5600
48	SARS2	37	1	T1	1
48	SARS2	37	1	T3	1
72	SARS2	37	1	N	20000
72	SARS2	37	1	T1	1
72	SARS2	37	1	T3	1
1	SARS	33	3	N	1120
1	SARS	33	3	T1	440
1	SARS	33	3	T3	960
24	SARS	33	3	N	80
24	SARS	33	3	T1	120
24	SARS	33	3	T3	160
48	SARS	33	3	N	40
48	SARS	33	3	T1	1
48	SARS	33	3	T3	1
72	SARS	33	3	N	400
72	SARS	33	3	T1	1
72	SARS	33	3	T3	1
1	SARS2	33	3	N	320
1	SARS2	33	3	T1	240
1	SARS2	33	3	T3	440
24	SARS2	33	3	N	1
24	SARS2	33	3	T1	1
24	SARS2	33	3	T3	1
48	SARS2	33	3	N	760
48	SARS2	33	3	T1	1
48	SARS2	33	3	T3	1
72	SARS2	33	3	N	14800
72	SARS2	33	3	T1	160
72	SARS2	33	3	T3	1
1	SARS2	37	3	N	80
1	SARS2	37	3	T1	320
1	SARS2	37	3	T3	280
24	SARS2	37	3	N	160
24	SARS2	37	3	T1	1
24	SARS2	37	3	T3	1
48	SARS2	37	3	N	1320
48	SARS2	37	3	T1	1
48	SARS2	37	3	T3	1
72	SARS2	37	3	N	14400
72	SARS2	37	3	T1	1
72	SARS2	37	3	T3	40
1	SARS	33	2	N	440
1	SARS	33	2	T1	440
1	SARS	33	2	T3	360
24	SARS	33	2	N	80
24	SARS	33	2	T1	80
24	SARS	33	2	T3	80
48	SARS	33	2	N	160
48	SARS	33	2	T1	1
48	SARS	33	2	T3	1
72	SARS	33	2	N	840
72	SARS	33	2	T1	1
72	SARS	33	2	T3	1
1	SARS2	33	2	N	120
1	SARS2	33	2	T1	320
1	SARS2	33	2	T3	320
24	SARS2	33	2	N	40
24	SARS2	33	2	T1	1
24	SARS2	33	2	T3	1
48	SARS2	33	2	N	1320
48	SARS2	33	2	T1	1
48	SARS2	33	2	T3	1
72	SARS2	33	2	N	12000
72	SARS2	33	2	T1	1
72	SARS2	33	2	T3	1
1	SARS	37	2	N	720
1	SARS	37	2	T1	840
1	SARS	37	2	T3	520
24	SARS	37	2	N	1
24	SARS	37	2	T1	1
24	SARS	37	2	T3	40
48	SARS	37	2	N	840
48	SARS	37	2	T1	1
48	SARS	37	2	T3	1
72	SARS	37	2	N	11200
72	SARS	37	2	T1	1
72	SARS	37	2	T3	1
1	SARS2	37	2	N	200
1	SARS2	37	2	T1	160
1	SARS2	37	2	T3	80
24	SARS2	37	2	N	1
24	SARS2	37	2	T1	1
24	SARS2	37	2	T3	1
48	SARS2	37	2	N	200
48	SARS2	37	2	T1	1
48	SARS2	37	2	T3	40
72	SARS2	37	2	N	1240
72	SARS2	37	2	T1	1
72	SARS2	37	2	T3	680

## Sheet: Fig 4b
Gene	Donor	Condition	Temperature	Time	Measurement	Mean	SD
IFNB1	D1	Mock	33	24	0	0.127454	0.337211
IFNL1	D1	Mock	33	24	0	0.16574	0.438506
IFNL2	D1	Mock	33	24	0	0	0
IFNL3	D1	Mock	33	24	0	0	0
IFNB1	D1	Mock	33	48	0	0	0
IFNL1	D1	Mock	33	48	0	0.182628	0.483187
IFNL2	D1	Mock	33	48	0	0.182628	0.483187
IFNL3	D1	Mock	33	48	0	0	0
IFNB1	D1	Mock	33	72	0	0	0
IFNL1	D1	Mock	33	72	0	0	0
IFNL2	D1	Mock	33	72	0	0.10621	0.281004
IFNL3	D1	Mock	33	72	0	0.297183	0.53566
IFNB1	D1	Mock	33	96	0.729089	0.18592	0.320727
IFNL1	D1	Mock	33	96	0	0	0
IFNL2	D1	Mock	33	96	0	0	0
IFNL3	D1	Mock	33	96	0.729089	0.104156	0.27557
IFNB1	D1	Mock	37	24	0	0	0
IFNL1	D1	Mock	37	24	0	0.107824	0.285276
IFNL2	D1	Mock	37	24	0	0	0
IFNL3	D1	Mock	37	24	0.805169	0.115024	0.304325
IFNB1	D1	Mock	37	48	0	0.944828	2.49978
IFNL1	D1	Mock	37	48	0	0	0
IFNL2	D1	Mock	37	48	0	0	0
IFNL3	D1	Mock	37	48	0	0.234236	0.414013
IFNB1	D1	Mock	37	72	0.78888	0.112697	0.298168
IFNL1	D1	Mock	37	72	0.78888	0.308189	0.552284
IFNL2	D1	Mock	37	72	0	0.165105	0.436827
IFNL3	D1	Mock	37	72	0	0	0
IFNB1	D1	Mock	37	96	0	0	0
IFNL1	D1	Mock	37	96	0	0.229889	0.608229
IFNL2	D1	Mock	37	96	0	0	0
IFNL3	D1	Mock	37	96	1.23282	0.176117	0.465963
IFNB1	D1	SARS-CoV	33	24	0	0.153386	0.405822
IFNL1	D1	SARS-CoV	33	24	1.20894	0.172706	0.456936
IFNL2	D1	SARS-CoV	33	24	0	0	0
IFNL3	D1	SARS-CoV	33	24	0	0.240255	0.431769
IFNB1	D1	SARS-CoV	33	48	0	0	0
IFNL1	D1	SARS-CoV	33	48	0	0	0
IFNL2	D1	SARS-CoV	33	48	0	0	0
IFNL3	D1	SARS-CoV	33	48	0	0	0
IFNB1	D1	SARS-CoV	33	72	0	0	0
IFNL1	D1	SARS-CoV	33	72	0	0.168414	0.445582
IFNL2	D1	SARS-CoV	33	72	0	0.168414	0.445582
IFNL3	D1	SARS-CoV	33	72	0	0	0
IFNB1	D1	SARS-CoV	33	96	0.849293	0.121328	0.321003
IFNL1	D1	SARS-CoV	33	96	0.849293	0.121328	0.321003
IFNL2	D1	SARS-CoV	33	96	0	0.0856756	0.226676
IFNL3	D1	SARS-CoV	33	96	0	0	0
IFNB1	D1	SARS-CoV	37	24	0	0.116605	0.308507
IFNL1	D1	SARS-CoV	37	24	0.623544	0.200031	0.344467
IFNL2	D1	SARS-CoV	37	24	0	0	0
IFNL3	D1	SARS-CoV	37	24	0.623544	0.290315	0.365481
IFNB1	D1	SARS-CoV	37	48	0	0	0
IFNL1	D1	SARS-CoV	37	48	0	0.109473	0.289637
IFNL2	D1	SARS-CoV	37	48	0	0	0
IFNL3	D1	SARS-CoV	37	48	0	0.251297	0.664871
IFNB1	D1	SARS-CoV	37	72	0.687254	0.0981791	0.259758
IFNL1	D1	SARS-CoV	37	72	0	0.164544	0.435344
IFNL2	D1	SARS-CoV	37	72	0.687254	0.262724	0.468298
IFNL3	D1	SARS-CoV	37	72	0	0.270745	0.477179
IFNB1	D1	SARS-CoV	37	96	0	0.278981	0.738114
IFNL1	D1	SARS-CoV	37	96	0	0	0
IFNL2	D1	SARS-CoV	37	96	0	0	0
IFNL3	D1	SARS-CoV	37	96	0	0.310763	0.534601
IFNB1	D1	SARS-CoV-2	33	24	0.989834	0.141405	0.374122
IFNL1	D1	SARS-CoV-2	33	24	0	0.1313	0.347388
IFNL2	D1	SARS-CoV-2	33	24	0	0	0
IFNL3	D1	SARS-CoV-2	33	24	0	0	0
IFNB1	D1	SARS-CoV-2	33	48	0.89902	0.128431	0.339798
IFNL1	D1	SARS-CoV-2	33	48	0	0.227608	0.391867
IFNL2	D1	SARS-CoV-2	33	48	0	0.143542	0.379777
IFNL3	D1	SARS-CoV-2	33	48	0	1.72251	4.55732
IFNB1	D1	SARS-CoV-2	33	72	3.69361	9.44488	20.5681
IFNL1	D1	SARS-CoV-2	33	72	1.84681	9.08237	21.3614
IFNL2	D1	SARS-CoV-2	33	72	2.46241	8.21825	14.5643
IFNL3	D1	SARS-CoV-2	33	72	1.2312	6.78816	17.4229
IFNB1	D1	SARS-CoV-2	33	96	1.25907	11.5955	23.1601
IFNL1	D1	SARS-CoV-2	33	96	3.77722	13.7636	25.2239
IFNL2	D1	SARS-CoV-2	33	96	0.629536	11.0906	18.733
IFNL3	D1	SARS-CoV-2	33	96	0.629536	7.80563	10.3131
IFNB1	D1	SARS-CoV-2	37	24	0	0.344432	0.43151
IFNL1	D1	SARS-CoV-2	37	24	0	0.123584	0.326973
IFNL2	D1	SARS-CoV-2	37	24	0	0.1038	0.274628
IFNL3	D1	SARS-CoV-2	37	24	0.884216	0.126317	0.334202
IFNB1	D1	SARS-CoV-2	37	48	0.772509	0.393398	0.498614
IFNL1	D1	SARS-CoV-2	37	48	0	1.95305	4.42278
IFNL2	D1	SARS-CoV-2	37	48	0	1.49072	3.2192
IFNL3	D1	SARS-CoV-2	37	48	0	3.11344	5.34657
IFNB1	D1	SARS-CoV-2	37	72	4.3164	1.36977	2.10937
IFNL1	D1	SARS-CoV-2	37	72	8.6328	4.25963	5.80022
IFNL2	D1	SARS-CoV-2	37	72	10.791	3.48855	4.90683
IFNL3	D1	SARS-CoV-2	37	72	6.4746	2.32762	3.81259
IFNB1	D1	SARS-CoV-2	37	96	1.3263	0.39979	0.68407
IFNL1	D1	SARS-CoV-2	37	96	0.663151	20.3454	47.776
IFNL2	D1	SARS-CoV-2	37	96	0.663151	11.1966	22.9844
IFNL3	D1	SARS-CoV-2	37	96	0.663151	6.27632	16.315
IFNB1	D2	Mock	33	24	0	0.127454	0.337211
IFNL1	D2	Mock	33	24	0	0.16574	0.438506
IFNL2	D2	Mock	33	24	0	0	0
IFNL3	D2	Mock	33	24	0	0	0
IFNB1	D2	Mock	33	48	0	0	0
IFNL1	D2	Mock	33	48	0	0.182628	0.483187
IFNL2	D2	Mock	33	48	0	0.182628	0.483187
IFNL3	D2	Mock	33	48	0	0	0
IFNB1	D2	Mock	33	72	0	0	0
IFNL1	D2	Mock	33	72	0	0	0
IFNL2	D2	Mock	33	72	0	0.10621	0.281004
IFNL3	D2	Mock	33	72	0	0.297183	0.53566
IFNB1	D2	Mock	33	96	0	0.18592	0.320727
IFNL1	D2	Mock	33	96	0	0	0
IFNL2	D2	Mock	33	96	0	0	0
IFNL3	D2	Mock	33	96	0	0.104156	0.27557
IFNB1	D2	Mock	37	24	0	0	0
IFNL1	D2	Mock	37	24	0.754771	0.107824	0.285276
IFNL2	D2	Mock	37	24	0	0	0
IFNL3	D2	Mock	37	24	0	0.115024	0.304325
IFNB1	D2	Mock	37	48	0	0.944828	2.49978
IFNL1	D2	Mock	37	48	0	0	0
IFNL2	D2	Mock	37	48	0	0	0
IFNL3	D2	Mock	37	48	0.635063	0.234236	0.414013
IFNB1	D2	Mock	37	72	0	0.112697	0.298168
IFNL1	D2	Mock	37	72	0	0.308189	0.552284
IFNL2	D2	Mock	37	72	0	0.165105	0.436827
IFNL3	D2	Mock	37	72	0	0	0
IFNB1	D2	Mock	37	96	0	0	0
IFNL1	D2	Mock	37	96	0	0.229889	0.608229
IFNL2	D2	Mock	37	96	0	0	0
IFNL3	D2	Mock	37	96	0	0.176117	0.465963
IFNB1	D2	SARS-CoV	33	24	1.0737	0.153386	0.405822
IFNL1	D2	SARS-CoV	33	24	0	0.172706	0.456936
IFNL2	D2	SARS-CoV	33	24	0	0	0
IFNL3	D2	SARS-CoV	33	24	1.0737	0.240255	0.431769
IFNB1	D2	SARS-CoV	33	48	0	0	0
IFNL1	D2	SARS-CoV	33	48	0	0	0
IFNL2	D2	SARS-CoV	33	48	0	0	0
IFNL3	D2	SARS-CoV	33	48	0	0	0
IFNB1	D2	SARS-CoV	33	72	0	0	0
IFNL1	D2	SARS-CoV	33	72	0	0.168414	0.445582
IFNL2	D2	SARS-CoV	33	72	0	0.168414	0.445582
IFNL3	D2	SARS-CoV	33	72	0	0	0
IFNB1	D2	SARS-CoV	33	96	0	0.121328	0.321003
IFNL1	D2	SARS-CoV	33	96	0	0.121328	0.321003
IFNL2	D2	SARS-CoV	33	96	0	0.0856756	0.226676
IFNL3	D2	SARS-CoV	33	96	0	0	0
IFNB1	D2	SARS-CoV	37	24	0.816232	0.116605	0.308507
IFNL1	D2	SARS-CoV	37	24	0	0.200031	0.344467
IFNL2	D2	SARS-CoV	37	24	0	0	0
IFNL3	D2	SARS-CoV	37	24	0	0.290315	0.365481
IFNB1	D2	SARS-CoV	37	48	0	0	0
IFNL1	D2	SARS-CoV	37	48	0	0.109473	0.289637
IFNL2	D2	SARS-CoV	37	48	0	0	0
IFNL3	D2	SARS-CoV	37	48	0	0.251297	0.664871
IFNB1	D2	SARS-CoV	37	72	0	0.0981791	0.259758
IFNL1	D2	SARS-CoV	37	72	0	0.164544	0.435344
IFNL2	D2	SARS-CoV	37	72	0	0.262724	0.468298
IFNL3	D2	SARS-CoV	37	72	0.743403	0.270745	0.477179
IFNB1	D2	SARS-CoV	37	96	0	0.278981	0.738114
IFNL1	D2	SARS-CoV	37	96	0	0	0
IFNL2	D2	SARS-CoV	37	96	0	0	0
IFNL3	D2	SARS-CoV	37	96	0	0.310763	0.534601
IFNB1	D2	SARS-CoV-2	33	24	0	0.141405	0.374122
IFNL1	D2	SARS-CoV-2	33	24	0	0.1313	0.347388
IFNL2	D2	SARS-CoV-2	33	24	0	0	0
IFNL3	D2	SARS-CoV-2	33	24	0	0	0
IFNB1	D2	SARS-CoV-2	33	48	0	0.128431	0.339798
IFNL1	D2	SARS-CoV-2	33	48	0	0.227608	0.391867
IFNL2	D2	SARS-CoV-2	33	48	0	0.143542	0.379777
IFNL3	D2	SARS-CoV-2	33	48	0	1.72251	4.55732
IFNB1	D2	SARS-CoV-2	33	72	0	9.44488	20.5681
IFNL1	D2	SARS-CoV-2	33	72	0.643167	9.08237	21.3614
IFNL2	D2	SARS-CoV-2	33	72	0.643167	8.21825	14.5643
IFNL3	D2	SARS-CoV-2	33	72	0	6.78816	17.4229
IFNB1	D2	SARS-CoV-2	33	96	0.613354	11.5955	23.1601
IFNL1	D2	SARS-CoV-2	33	96	1.22671	13.7636	25.2239
IFNL2	D2	SARS-CoV-2	33	96	0	11.0906	18.733
IFNL3	D2	SARS-CoV-2	33	96	0.613354	7.80563	10.3131
IFNB1	D2	SARS-CoV-2	37	24	0.81934	0.344432	0.43151
IFNL1	D2	SARS-CoV-2	37	24	0	0.123584	0.326973
IFNL2	D2	SARS-CoV-2	37	24	0	0.1038	0.274628
IFNL3	D2	SARS-CoV-2	37	24	0	0.126317	0.334202
IFNB1	D2	SARS-CoV-2	37	48	0.902525	0.393398	0.498614
IFNL1	D2	SARS-CoV-2	37	48	1.80505	1.95305	4.42278
IFNL2	D2	SARS-CoV-2	37	48	1.80505	1.49072	3.2192
IFNL3	D2	SARS-CoV-2	37	48	9.92778	3.11344	5.34657
IFNB1	D2	SARS-CoV-2	37	72	0.725182	1.36977	2.10937
IFNL1	D2	SARS-CoV-2	37	72	3.62591	4.25963	5.80022
IFNL2	D2	SARS-CoV-2	37	72	3.62591	3.48855	4.90683
IFNL3	D2	SARS-CoV-2	37	72	0.725182	2.32762	3.81259
IFNB1	D2	SARS-CoV-2	37	96	0	0.39979	0.68407
IFNL1	D2	SARS-CoV-2	37	96	0	20.3454	47.776
IFNL2	D2	SARS-CoV-2	37	96	0	11.1966	22.9844
IFNL3	D2	SARS-CoV-2	37	96	0	6.27632	16.315
IFNB1	D3	Mock	33	24	0	0.127454	0.337211
IFNL1	D3	Mock	33	24	0	0.16574	0.438506
IFNL2	D3	Mock	33	24	0	0	0
IFNL3	D3	Mock	33	24	0	0	0
IFNB1	D3	Mock	33	48	0	0	0
IFNL1	D3	Mock	33	48	1.27839	0.182628	0.483187
IFNL2	D3	Mock	33	48	1.27839	0.182628	0.483187
IFNL3	D3	Mock	33	48	0	0	0
IFNB1	D3	Mock	33	72	0	0	0
IFNL1	D3	Mock	33	72	0	0	0
IFNL2	D3	Mock	33	72	0.743468	0.10621	0.281004
IFNL3	D3	Mock	33	72	0.743468	0.297183	0.53566
IFNB1	D3	Mock	33	96	0	0.18592	0.320727
IFNL1	D3	Mock	33	96	0	0	0
IFNL2	D3	Mock	33	96	0	0	0
IFNL3	D3	Mock	33	96	0	0.104156	0.27557
IFNB1	D3	Mock	37	24	0	0	0
IFNL1	D3	Mock	37	24	0	0.107824	0.285276
IFNL2	D3	Mock	37	24	0	0	0
IFNL3	D3	Mock	37	24	0	0.115024	0.304325
IFNB1	D3	Mock	37	48	0	0.944828	2.49978
IFNL1	D3	Mock	37	48	0	0	0
IFNL2	D3	Mock	37	48	0	0	0
IFNL3	D3	Mock	37	48	1.00459	0.234236	0.414013
IFNB1	D3	Mock	37	72	0	0.112697	0.298168
IFNL1	D3	Mock	37	72	1.36844	0.308189	0.552284
IFNL2	D3	Mock	37	72	0	0.165105	0.436827
IFNL3	D3	Mock	37	72	0	0	0
IFNB1	D3	Mock	37	96	0	0	0
IFNL1	D3	Mock	37	96	1.60922	0.229889	0.608229
IFNL2	D3	Mock	37	96	0	0	0
IFNL3	D3	Mock	37	96	0	0.176117	0.465963
IFNB1	D3	SARS-CoV	33	24	0	0.153386	0.405822
IFNL1	D3	SARS-CoV	33	24	0	0.172706	0.456936
IFNL2	D3	SARS-CoV	33	24	0	0	0
IFNL3	D3	SARS-CoV	33	24	0	0.240255	0.431769
IFNB1	D3	SARS-CoV	33	48	0	0	0
IFNL1	D3	SARS-CoV	33	48	0	0	0
IFNL2	D3	SARS-CoV	33	48	0	0	0
IFNL3	D3	SARS-CoV	33	48	0	0	0
IFNB1	D3	SARS-CoV	33	72	0	0	0
IFNL1	D3	SARS-CoV	33	72	1.1789	0.168414	0.445582
IFNL2	D3	SARS-CoV	33	72	1.1789	0.168414	0.445582
IFNL3	D3	SARS-CoV	33	72	0	0	0
IFNB1	D3	SARS-CoV	33	96	0	0.121328	0.321003
IFNL1	D3	SARS-CoV	33	96	0	0.121328	0.321003
IFNL2	D3	SARS-CoV	33	96	0	0.0856756	0.226676
IFNL3	D3	SARS-CoV	33	96	0	0	0
IFNB1	D3	SARS-CoV	37	24	0	0.116605	0.308507
IFNL1	D3	SARS-CoV	37	24	0.776674	0.200031	0.344467
IFNL2	D3	SARS-CoV	37	24	0	0	0
IFNL3	D3	SARS-CoV	37	24	0.776674	0.290315	0.365481
IFNB1	D3	SARS-CoV	37	48	0	0	0
IFNL1	D3	SARS-CoV	37	48	0	0.109473	0.289637
IFNL2	D3	SARS-CoV	37	48	0	0	0
IFNL3	D3	SARS-CoV	37	48	0	0.251297	0.664871
IFNB1	D3	SARS-CoV	37	72	0	0.0981791	0.259758
IFNL1	D3	SARS-CoV	37	72	1.15181	0.164544	0.435344
IFNL2	D3	SARS-CoV	37	72	1.15181	0.262724	0.468298
IFNL3	D3	SARS-CoV	37	72	1.15181	0.270745	0.477179
IFNB1	D3	SARS-CoV	37	96	1.95287	0.278981	0.738114
IFNL1	D3	SARS-CoV	37	96	0	0	0
IFNL2	D3	SARS-CoV	37	96	0	0	0
IFNL3	D3	SARS-CoV	37	96	0.976433	0.310763	0.534601
IFNB1	D3	SARS-CoV-2	33	24	0	0.141405	0.374122
IFNL1	D3	SARS-CoV-2	33	24	0.919102	0.1313	0.347388
IFNL2	D3	SARS-CoV-2	33	24	0	0	0
IFNL3	D3	SARS-CoV-2	33	24	0	0	0
IFNB1	D3	SARS-CoV-2	33	48	0	0.128431	0.339798
IFNL1	D3	SARS-CoV-2	33	48	0.882559	0.227608	0.391867
IFNL2	D3	SARS-CoV-2	33	48	0	0.143542	0.379777
IFNL3	D3	SARS-CoV-2	33	48	0	1.72251	4.55732
IFNB1	D3	SARS-CoV-2	33	72	55.7145	9.44488	20.5681
IFNL1	D3	SARS-CoV-2	33	72	57.4288	9.08237	21.3614
IFNL2	D3	SARS-CoV-2	33	72	38.5716	8.21825	14.5643
IFNL3	D3	SARS-CoV-2	33	72	46.2859	6.78816	17.4229
IFNB1	D3	SARS-CoV-2	33	96	17.1359	11.5955	23.1601
IFNL1	D3	SARS-CoV-2	33	96	67.5355	13.7636	25.2239
IFNL2	D3	SARS-CoV-2	33	96	39.3117	11.0906	18.733
IFNL3	D3	SARS-CoV-2	33	96	16.1279	7.80563	10.3131
IFNB1	D3	SARS-CoV-2	37	24	0.865089	0.344432	0.43151
IFNL1	D3	SARS-CoV-2	37	24	0.865089	0.123584	0.326973
IFNL2	D3	SARS-CoV-2	37	24	0	0.1038	0.274628
IFNL3	D3	SARS-CoV-2	37	24	0	0.126317	0.334202
IFNB1	D3	SARS-CoV-2	37	48	1.07875	0.393398	0.498614
IFNL1	D3	SARS-CoV-2	37	48	11.8663	1.95305	4.42278
IFNL2	D3	SARS-CoV-2	37	48	8.63001	1.49072	3.2192
IFNL3	D3	SARS-CoV-2	37	48	11.8663	3.11344	5.34657
IFNB1	D3	SARS-CoV-2	37	72	4.5468	1.36977	2.10937
IFNL1	D3	SARS-CoV-2	37	72	15.4591	4.25963	5.80022
IFNL2	D3	SARS-CoV-2	37	72	10.003	3.48855	4.90683
IFNL3	D3	SARS-CoV-2	37	72	9.09359	2.32762	3.81259
IFNB1	D3	SARS-CoV-2	37	96	0	0.39979	0.68407
IFNL1	D3	SARS-CoV-2	37	96	0	20.3454	47.776
IFNL2	D3	SARS-CoV-2	37	96	0	11.1966	22.9844
IFNL3	D3	SARS-CoV-2	37	96	0	6.27632	16.315
IFNB1	D4	Mock	33	24	0	0.127454	0.337211
IFNL1	D4	Mock	33	24	1.16018	0.16574	0.438506
IFNL2	D4	Mock	33	24	0	0	0
IFNL3	D4	Mock	33	24	0	0	0
IFNB1	D4	Mock	33	48	0	0	0
IFNL1	D4	Mock	33	48	0	0.182628	0.483187
IFNL2	D4	Mock	33	48	0	0.182628	0.483187
IFNL3	D4	Mock	33	48	0	0	0
IFNB1	D4	Mock	33	72	0	0	0
IFNL1	D4	Mock	33	72	0	0	0
IFNL2	D4	Mock	33	72	0	0.10621	0.281004
IFNL3	D4	Mock	33	72	1.33681	0.297183	0.53566
IFNB1	D4	Mock	33	96	0	0.18592	0.320727
IFNL1	D4	Mock	33	96	0	0	0
IFNL2	D4	Mock	33	96	0	0	0
IFNL3	D4	Mock	33	96	0	0.104156	0.27557
IFNB1	D4	Mock	37	24	0	0	0
IFNL1	D4	Mock	37	24	0	0.107824	0.285276
IFNL2	D4	Mock	37	24	0	0	0
IFNL3	D4	Mock	37	24	0	0.115024	0.304325
IFNB1	D4	Mock	37	48	0	0.944828	2.49978
IFNL1	D4	Mock	37	48	0	0	0
IFNL2	D4	Mock	37	48	0	0	0
IFNL3	D4	Mock	37	48	0	0.234236	0.414013
IFNB1	D4	Mock	37	72	0	0.112697	0.298168
IFNL1	D4	Mock	37	72	0	0.308189	0.552284
IFNL2	D4	Mock	37	72	0	0.165105	0.436827
IFNL3	D4	Mock	37	72	0	0	0
IFNB1	D4	Mock	37	96	0	0	0
IFNL1	D4	Mock	37	96	0	0.229889	0.608229
IFNL2	D4	Mock	37	96	0	0	0
IFNL3	D4	Mock	37	96	0	0.176117	0.465963
IFNB1	D4	SARS-CoV	33	24	0	0.153386	0.405822
IFNL1	D4	SARS-CoV	33	24	0	0.172706	0.456936
IFNL2	D4	SARS-CoV	33	24	0	0	0
IFNL3	D4	SARS-CoV	33	24	0	0.240255	0.431769
IFNB1	D4	SARS-CoV	33	48	0	0	0
IFNL1	D4	SARS-CoV	33	48	0	0	0
IFNL2	D4	SARS-CoV	33	48	0	0	0
IFNL3	D4	SARS-CoV	33	48	0	0	0
IFNB1	D4	SARS-CoV	33	72	0	0	0
IFNL1	D4	SARS-CoV	33	72	0	0.168414	0.445582
IFNL2	D4	SARS-CoV	33	72	0	0.168414	0.445582
IFNL3	D4	SARS-CoV	33	72	0	0	0
IFNB1	D4	SARS-CoV	33	96	0	0.121328	0.321003
IFNL1	D4	SARS-CoV	33	96	0	0.121328	0.321003
IFNL2	D4	SARS-CoV	33	96	0	0.0856756	0.226676
IFNL3	D4	SARS-CoV	33	96	0	0	0
IFNB1	D4	SARS-CoV	37	24	0	0.116605	0.308507
IFNL1	D4	SARS-CoV	37	24	0	0.200031	0.344467
IFNL2	D4	SARS-CoV	37	24	0	0	0
IFNL3	D4	SARS-CoV	37	24	0	0.290315	0.365481
IFNB1	D4	SARS-CoV	37	48	0	0	0
IFNL1	D4	SARS-CoV	37	48	0.766309	0.109473	0.289637
IFNL2	D4	SARS-CoV	37	48	0	0	0
IFNL3	D4	SARS-CoV	37	48	0	0.251297	0.664871
IFNB1	D4	SARS-CoV	37	72	0	0.0981791	0.259758
IFNL1	D4	SARS-CoV	37	72	0	0.164544	0.435344
IFNL2	D4	SARS-CoV	37	72	0	0.262724	0.468298
IFNL3	D4	SARS-CoV	37	72	0	0.270745	0.477179
IFNB1	D4	SARS-CoV	37	96	0	0.278981	0.738114
IFNL1	D4	SARS-CoV	37	96	0	0	0
IFNL2	D4	SARS-CoV	37	96	0	0	0
IFNL3	D4	SARS-CoV	37	96	0	0.310763	0.534601
IFNB1	D4	SARS-CoV-2	33	24	0	0.141405	0.374122
IFNL1	D4	SARS-CoV-2	33	24	0	0.1313	0.347388
IFNL2	D4	SARS-CoV-2	33	24	0	0	0
IFNL3	D4	SARS-CoV-2	33	24	0	0	0
IFNB1	D4	SARS-CoV-2	33	48	0	0.128431	0.339798
IFNL1	D4	SARS-CoV-2	33	48	0	0.227608	0.391867
IFNL2	D4	SARS-CoV-2	33	48	1.00479	0.143542	0.379777
IFNL3	D4	SARS-CoV-2	33	48	12.0575	1.72251	4.55732
IFNB1	D4	SARS-CoV-2	33	72	0	9.44488	20.5681
IFNL1	D4	SARS-CoV-2	33	72	0	9.08237	21.3614
IFNL2	D4	SARS-CoV-2	33	72	0	8.21825	14.5643
IFNL3	D4	SARS-CoV-2	33	72	0	6.78816	17.4229
IFNB1	D4	SARS-CoV-2	33	96	0	11.5955	23.1601
IFNL1	D4	SARS-CoV-2	33	96	0	13.7636	25.2239
IFNL2	D4	SARS-CoV-2	33	96	0	11.0906	18.733
IFNL3	D4	SARS-CoV-2	33	96	26.0269	7.80563	10.3131
IFNB1	D4	SARS-CoV-2	37	24	0.726598	0.344432	0.43151
IFNL1	D4	SARS-CoV-2	37	24	0	0.123584	0.326973
IFNL2	D4	SARS-CoV-2	37	24	0.726598	0.1038	0.274628
IFNL3	D4	SARS-CoV-2	37	24	0	0.126317	0.334202
IFNB1	D4	SARS-CoV-2	37	48	0	0.393398	0.498614
IFNL1	D4	SARS-CoV-2	37	48	0	1.95305	4.42278
IFNL2	D4	SARS-CoV-2	37	48	0	1.49072	3.2192
IFNL3	D4	SARS-CoV-2	37	48	0	3.11344	5.34657
IFNB1	D4	SARS-CoV-2	37	72	0	1.36977	2.10937
IFNL1	D4	SARS-CoV-2	37	72	0	4.25963	5.80022
IFNL2	D4	SARS-CoV-2	37	72	0	3.48855	4.90683
IFNL3	D4	SARS-CoV-2	37	72	0	2.32762	3.81259
IFNB1	D4	SARS-CoV-2	37	96	0	0.39979	0.68407
IFNL1	D4	SARS-CoV-2	37	96	13.6708	20.3454	47.776
IFNL2	D4	SARS-CoV-2	37	96	61.5188	11.1966	22.9844
IFNL3	D4	SARS-CoV-2	37	96	0	6.27632	16.315
IFNB1	D5	Mock	33	24	0	0.127454	0.337211
IFNL1	D5	Mock	33	24	0	0.16574	0.438506
IFNL2	D5	Mock	33	24	0	0	0
IFNL3	D5	Mock	33	24	0	0	0
IFNB1	D5	Mock	33	48	0	0	0
IFNL1	D5	Mock	33	48	0	0.182628	0.483187
IFNL2	D5	Mock	33	48	0	0.182628	0.483187
IFNL3	D5	Mock	33	48	0	0	0
IFNB1	D5	Mock	33	72	0	0	0
IFNL1	D5	Mock	33	72	0	0	0
IFNL2	D5	Mock	33	72	0	0.10621	0.281004
IFNL3	D5	Mock	33	72	0	0.297183	0.53566
IFNB1	D5	Mock	33	96	0	0.18592	0.320727
IFNL1	D5	Mock	33	96	0	0	0
IFNL2	D5	Mock	33	96	0	0	0
IFNL3	D5	Mock	33	96	0	0.104156	0.27557
IFNB1	D5	Mock	37	24	0	0	0
IFNL1	D5	Mock	37	24	0	0.107824	0.285276
IFNL2	D5	Mock	37	24	0	0	0
IFNL3	D5	Mock	37	24	0	0.115024	0.304325
IFNB1	D5	Mock	37	48	0	0.944828	2.49978
IFNL1	D5	Mock	37	48	0	0	0
IFNL2	D5	Mock	37	48	0	0	0
IFNL3	D5	Mock	37	48	0	0.234236	0.414013
IFNB1	D5	Mock	37	72	0	0.112697	0.298168
IFNL1	D5	Mock	37	72	0	0.308189	0.552284
IFNL2	D5	Mock	37	72	1.15573	0.165105	0.436827
IFNL3	D5	Mock	37	72	0	0	0
IFNB1	D5	Mock	37	96	0	0	0
IFNL1	D5	Mock	37	96	0	0.229889	0.608229
IFNL2	D5	Mock	37	96	0	0	0
IFNL3	D5	Mock	37	96	0	0.176117	0.465963
IFNB1	D5	SARS-CoV	33	24	0	0.153386	0.405822
IFNL1	D5	SARS-CoV	33	24	0	0.172706	0.456936
IFNL2	D5	SARS-CoV	33	24	0	0	0
IFNL3	D5	SARS-CoV	33	24	0	0.240255	0.431769
IFNB1	D5	SARS-CoV	33	48	0	0	0
IFNL1	D5	SARS-CoV	33	48	0	0	0
IFNL2	D5	SARS-CoV	33	48	0	0	0
IFNL3	D5	SARS-CoV	33	48	0	0	0
IFNB1	D5	SARS-CoV	33	72	0	0	0
IFNL1	D5	SARS-CoV	33	72	0	0.168414	0.445582
IFNL2	D5	SARS-CoV	33	72	0	0.168414	0.445582
IFNL3	D5	SARS-CoV	33	72	0	0	0
IFNB1	D5	SARS-CoV	33	96	0	0.121328	0.321003
IFNL1	D5	SARS-CoV	33	96	0	0.121328	0.321003
IFNL2	D5	SARS-CoV	33	96	0	0.0856756	0.226676
IFNL3	D5	SARS-CoV	33	96	0	0	0
IFNB1	D5	SARS-CoV	37	24	0	0.116605	0.308507
IFNL1	D5	SARS-CoV	37	24	0	0.200031	0.344467
IFNL2	D5	SARS-CoV	37	24	0	0	0
IFNL3	D5	SARS-CoV	37	24	0.631989	0.290315	0.365481
IFNB1	D5	SARS-CoV	37	48	0	0	0
IFNL1	D5	SARS-CoV	37	48	0	0.109473	0.289637
IFNL2	D5	SARS-CoV	37	48	0	0	0
IFNL3	D5	SARS-CoV	37	48	0	0.251297	0.664871
IFNB1	D5	SARS-CoV	37	72	0	0.0981791	0.259758
IFNL1	D5	SARS-CoV	37	72	0	0.164544	0.435344
IFNL2	D5	SARS-CoV	37	72	0	0.262724	0.468298
IFNL3	D5	SARS-CoV	37	72	0	0.270745	0.477179
IFNB1	D5	SARS-CoV	37	96	0	0.278981	0.738114
IFNL1	D5	SARS-CoV	37	96	0	0	0
IFNL2	D5	SARS-CoV	37	96	0	0	0
IFNL3	D5	SARS-CoV	37	96	0	0.310763	0.534601
IFNB1	D5	SARS-CoV-2	33	24	0	0.141405	0.374122
IFNL1	D5	SARS-CoV-2	33	24	0	0.1313	0.347388
IFNL2	D5	SARS-CoV-2	33	24	0	0	0
IFNL3	D5	SARS-CoV-2	33	24	0	0	0
IFNB1	D5	SARS-CoV-2	33	48	0	0.128431	0.339798
IFNL1	D5	SARS-CoV-2	33	48	0	0.227608	0.391867
IFNL2	D5	SARS-CoV-2	33	48	0	0.143542	0.379777
IFNL3	D5	SARS-CoV-2	33	48	0	1.72251	4.55732
IFNB1	D5	SARS-CoV-2	33	72	0	9.44488	20.5681
IFNL1	D5	SARS-CoV-2	33	72	0	9.08237	21.3614
IFNL2	D5	SARS-CoV-2	33	72	0	8.21825	14.5643
IFNL3	D5	SARS-CoV-2	33	72	0	6.78816	17.4229
IFNB1	D5	SARS-CoV-2	33	96	0	11.5955	23.1601
IFNL1	D5	SARS-CoV-2	33	96	0	13.7636	25.2239
IFNL2	D5	SARS-CoV-2	33	96	0	11.0906	18.733
IFNL3	D5	SARS-CoV-2	33	96	0	7.80563	10.3131
IFNB1	D5	SARS-CoV-2	37	24	0	0.344432	0.43151
IFNL1	D5	SARS-CoV-2	37	24	0	0.123584	0.326973
IFNL2	D5	SARS-CoV-2	37	24	0	0.1038	0.274628
IFNL3	D5	SARS-CoV-2	37	24	0	0.126317	0.334202
IFNB1	D5	SARS-CoV-2	37	48	0	0.393398	0.498614
IFNL1	D5	SARS-CoV-2	37	48	0	1.95305	4.42278
IFNL2	D5	SARS-CoV-2	37	48	0	1.49072	3.2192
IFNL3	D5	SARS-CoV-2	37	48	0	3.11344	5.34657
IFNB1	D5	SARS-CoV-2	37	72	0	1.36977	2.10937
IFNL1	D5	SARS-CoV-2	37	72	0.996691	4.25963	5.80022
IFNL2	D5	SARS-CoV-2	37	72	0	3.48855	4.90683
IFNL3	D5	SARS-CoV-2	37	72	0	2.32762	3.81259
IFNB1	D5	SARS-CoV-2	37	96	0	0.39979	0.68407
IFNL1	D5	SARS-CoV-2	37	96	0	20.3454	47.776
IFNL2	D5	SARS-CoV-2	37	96	0	11.1966	22.9844
IFNL3	D5	SARS-CoV-2	37	96	43.2711	6.27632	16.315
IFNB1	D6	Mock	33	24	0	0.127454	0.337211
IFNL1	D6	Mock	33	24	0	0.16574	0.438506
IFNL2	D6	Mock	33	24	0	0	0
IFNL3	D6	Mock	33	24	0	0	0
IFNB1	D6	Mock	33	48	0	0	0
IFNL1	D6	Mock	33	48	0	0.182628	0.483187
IFNL2	D6	Mock	33	48	0	0.182628	0.483187
IFNL3	D6	Mock	33	48	0	0	0
IFNB1	D6	Mock	33	72	0	0	0
IFNL1	D6	Mock	33	72	0	0	0
IFNL2	D6	Mock	33	72	0	0.10621	0.281004
IFNL3	D6	Mock	33	72	0	0.297183	0.53566
IFNB1	D6	Mock	33	96	0	0.18592	0.320727
IFNL1	D6	Mock	33	96	0	0	0
IFNL2	D6	Mock	33	96	0	0	0
IFNL3	D6	Mock	33	96	0	0.104156	0.27557
IFNB1	D6	Mock	37	24	0	0	0
IFNL1	D6	Mock	37	24	0	0.107824	0.285276
IFNL2	D6	Mock	37	24	0	0	0
IFNL3	D6	Mock	37	24	0	0.115024	0.304325
IFNB1	D6	Mock	37	48	0	0.944828	2.49978
IFNL1	D6	Mock	37	48	0	0	0
IFNL2	D6	Mock	37	48	0	0	0
IFNL3	D6	Mock	37	48	0	0.234236	0.414013
IFNB1	D6	Mock	37	72	0	0.112697	0.298168
IFNL1	D6	Mock	37	72	0	0.308189	0.552284
IFNL2	D6	Mock	37	72	0	0.165105	0.436827
IFNL3	D6	Mock	37	72	0	0	0
IFNB1	D6	Mock	37	96	0	0	0
IFNL1	D6	Mock	37	96	0	0.229889	0.608229
IFNL2	D6	Mock	37	96	0	0	0
IFNL3	D6	Mock	37	96	0	0.176117	0.465963
IFNB1	D6	SARS-CoV	33	24	0	0.153386	0.405822
IFNL1	D6	SARS-CoV	33	24	0	0.172706	0.456936
IFNL2	D6	SARS-CoV	33	24	0	0	0
IFNL3	D6	SARS-CoV	33	24	0	0.240255	0.431769
IFNB1	D6	SARS-CoV	33	48	0	0	0
IFNL1	D6	SARS-CoV	33	48	0	0	0
IFNL2	D6	SARS-CoV	33	48	0	0	0
IFNL3	D6	SARS-CoV	33	48	0	0	0
IFNB1	D6	SARS-CoV	33	72	0	0	0
IFNL1	D6	SARS-CoV	33	72	0	0.168414	0.445582
IFNL2	D6	SARS-CoV	33	72	0	0.168414	0.445582
IFNL3	D6	SARS-CoV	33	72	0	0	0
IFNB1	D6	SARS-CoV	33	96	0	0.121328	0.321003
IFNL1	D6	SARS-CoV	33	96	0	0.121328	0.321003
IFNL2	D6	SARS-CoV	33	96	0.599729	0.0856756	0.226676
IFNL3	D6	SARS-CoV	33	96	0	0	0
IFNB1	D6	SARS-CoV	37	24	0	0.116605	0.308507
IFNL1	D6	SARS-CoV	37	24	0	0.200031	0.344467
IFNL2	D6	SARS-CoV	37	24	0	0	0
IFNL3	D6	SARS-CoV	37	24	0	0.290315	0.365481
IFNB1	D6	SARS-CoV	37	48	0	0	0
IFNL1	D6	SARS-CoV	37	48	0	0.109473	0.289637
IFNL2	D6	SARS-CoV	37	48	0	0	0
IFNL3	D6	SARS-CoV	37	48	0	0.251297	0.664871
IFNB1	D6	SARS-CoV	37	72	0	0.0981791	0.259758
IFNL1	D6	SARS-CoV	37	72	0	0.164544	0.435344
IFNL2	D6	SARS-CoV	37	72	0	0.262724	0.468298
IFNL3	D6	SARS-CoV	37	72	0	0.270745	0.477179
IFNB1	D6	SARS-CoV	37	96	0	0.278981	0.738114
IFNL1	D6	SARS-CoV	37	96	0	0	0
IFNL2	D6	SARS-CoV	37	96	0	0	0
IFNL3	D6	SARS-CoV	37	96	0	0.310763	0.534601
IFNB1	D6	SARS-CoV-2	33	24	0	0.141405	0.374122
IFNL1	D6	SARS-CoV-2	33	24	0	0.1313	0.347388
IFNL2	D6	SARS-CoV-2	33	24	0	0	0
IFNL3	D6	SARS-CoV-2	33	24	0	0	0
IFNB1	D6	SARS-CoV-2	33	48	0	0.128431	0.339798
IFNL1	D6	SARS-CoV-2	33	48	0.710694	0.227608	0.391867
IFNL2	D6	SARS-CoV-2	33	48	0	0.143542	0.379777
IFNL3	D6	SARS-CoV-2	33	48	0	1.72251	4.55732
IFNB1	D6	SARS-CoV-2	33	72	6.70602	9.44488	20.5681
IFNL1	D6	SARS-CoV-2	33	72	3.65783	9.08237	21.3614
IFNL2	D6	SARS-CoV-2	33	72	15.8506	8.21825	14.5643
IFNL3	D6	SARS-CoV-2	33	72	0	6.78816	17.4229
IFNB1	D6	SARS-CoV-2	33	96	62.1605	11.5955	23.1601
IFNL1	D6	SARS-CoV-2	33	96	23.8062	13.7636	25.2239
IFNL2	D6	SARS-CoV-2	33	96	37.6931	11.0906	18.733
IFNL3	D6	SARS-CoV-2	33	96	11.2418	7.80563	10.3131
IFNB1	D6	SARS-CoV-2	37	24	0	0.344432	0.43151
IFNL1	D6	SARS-CoV-2	37	24	0	0.123584	0.326973
IFNL2	D6	SARS-CoV-2	37	24	0	0.1038	0.274628
IFNL3	D6	SARS-CoV-2	37	24	0	0.126317	0.334202
IFNB1	D6	SARS-CoV-2	37	48	0	0.393398	0.498614
IFNL1	D6	SARS-CoV-2	37	48	0	1.95305	4.42278
IFNL2	D6	SARS-CoV-2	37	48	0	1.49072	3.2192
IFNL3	D6	SARS-CoV-2	37	48	0	3.11344	5.34657
IFNB1	D6	SARS-CoV-2	37	72	0	1.36977	2.10937
IFNL1	D6	SARS-CoV-2	37	72	0	4.25963	5.80022
IFNL2	D6	SARS-CoV-2	37	72	0	3.48855	4.90683
IFNL3	D6	SARS-CoV-2	37	72	0	2.32762	3.81259
IFNB1	D6	SARS-CoV-2	37	96	1.47223	0.39979	0.68407
IFNL1	D6	SARS-CoV-2	37	96	128.084	20.3454	47.776
IFNL2	D6	SARS-CoV-2	37	96	16.1945	11.1966	22.9844
IFNL3	D6	SARS-CoV-2	37	96	0	6.27632	16.315
IFNB1	D7	Mock	33	24	0.892177	0.127454	0.337211
IFNL1	D7	Mock	33	24	0	0.16574	0.438506
IFNL2	D7	Mock	33	24	0	0	0
IFNL3	D7	Mock	33	24	0	0	0
IFNB1	D7	Mock	33	48	0	0	0
IFNL1	D7	Mock	33	48	0	0.182628	0.483187
IFNL2	D7	Mock	33	48	0	0.182628	0.483187
IFNL3	D7	Mock	33	48	0	0	0
IFNB1	D7	Mock	33	72	0	0	0
IFNL1	D7	Mock	33	72	0	0	0
IFNL2	D7	Mock	33	72	0	0.10621	0.281004
IFNL3	D7	Mock	33	72	0	0.297183	0.53566
IFNB1	D7	Mock	33	96	0.572352	0.18592	0.320727
IFNL1	D7	Mock	33	96	0	0	0
IFNL2	D7	Mock	33	96	0	0	0
IFNL3	D7	Mock	33	96	0	0.104156	0.27557
IFNB1	D7	Mock	37	24	0	0	0
IFNL1	D7	Mock	37	24	0	0.107824	0.285276
IFNL2	D7	Mock	37	24	0	0	0
IFNL3	D7	Mock	37	24	0	0.115024	0.304325
IFNB1	D7	Mock	37	48	6.6138	0.944828	2.49978
IFNL1	D7	Mock	37	48	0	0	0
IFNL2	D7	Mock	37	48	0	0	0
IFNL3	D7	Mock	37	48	0	0.234236	0.414013
IFNB1	D7	Mock	37	72	0	0.112697	0.298168
IFNL1	D7	Mock	37	72	0	0.308189	0.552284
IFNL2	D7	Mock	37	72	0	0.165105	0.436827
IFNL3	D7	Mock	37	72	0	0	0
IFNB1	D7	Mock	37	96	0	0	0
IFNL1	D7	Mock	37	96	0	0.229889	0.608229
IFNL2	D7	Mock	37	96	0	0	0
IFNL3	D7	Mock	37	96	0	0.176117	0.465963
IFNB1	D7	SARS-CoV	33	24	0	0.153386	0.405822
IFNL1	D7	SARS-CoV	33	24	0	0.172706	0.456936
IFNL2	D7	SARS-CoV	33	24	0	0	0
IFNL3	D7	SARS-CoV	33	24	0.608083	0.240255	0.431769
IFNB1	D7	SARS-CoV	33	48	0	0	0
IFNL1	D7	SARS-CoV	33	48	0	0	0
IFNL2	D7	SARS-CoV	33	48	0	0	0
IFNL3	D7	SARS-CoV	33	48	0	0	0
IFNB1	D7	SARS-CoV	33	72	0	0	0
IFNL1	D7	SARS-CoV	33	72	0	0.168414	0.445582
IFNL2	D7	SARS-CoV	33	72	0	0.168414	0.445582
IFNL3	D7	SARS-CoV	33	72	0	0	0
IFNB1	D7	SARS-CoV	33	96	0	0.121328	0.321003
IFNL1	D7	SARS-CoV	33	96	0	0.121328	0.321003
IFNL2	D7	SARS-CoV	33	96	0	0.0856756	0.226676
IFNL3	D7	SARS-CoV	33	96	0	0	0
IFNB1	D7	SARS-CoV	37	24	0	0.116605	0.308507
IFNL1	D7	SARS-CoV	37	24	0	0.200031	0.344467
IFNL2	D7	SARS-CoV	37	24	0	0	0
IFNL3	D7	SARS-CoV	37	24	0	0.290315	0.365481
IFNB1	D7	SARS-CoV	37	48	0	0	0
IFNL1	D7	SARS-CoV	37	48	0	0.109473	0.289637
IFNL2	D7	SARS-CoV	37	48	0	0	0
IFNL3	D7	SARS-CoV	37	48	1.75908	0.251297	0.664871
IFNB1	D7	SARS-CoV	37	72	0	0.0981791	0.259758
IFNL1	D7	SARS-CoV	37	72	0	0.164544	0.435344
IFNL2	D7	SARS-CoV	37	72	0	0.262724	0.468298
IFNL3	D7	SARS-CoV	37	72	0	0.270745	0.477179
IFNB1	D7	SARS-CoV	37	96	0	0.278981	0.738114
IFNL1	D7	SARS-CoV	37	96	0	0	0
IFNL2	D7	SARS-CoV	37	96	0	0	0
IFNL3	D7	SARS-CoV	37	96	1.19891	0.310763	0.534601
IFNB1	D7	SARS-CoV-2	33	24	0	0.141405	0.374122
IFNL1	D7	SARS-CoV-2	33	24	0	0.1313	0.347388
IFNL2	D7	SARS-CoV-2	33	24	0	0	0
IFNL3	D7	SARS-CoV-2	33	24	0	0	0
IFNB1	D7	SARS-CoV-2	33	48	0	0.128431	0.339798
IFNL1	D7	SARS-CoV-2	33	48	0	0.227608	0.391867
IFNL2	D7	SARS-CoV-2	33	48	0	0.143542	0.379777
IFNL3	D7	SARS-CoV-2	33	48	0	1.72251	4.55732
IFNB1	D7	SARS-CoV-2	33	72	0	9.44488	20.5681
IFNL1	D7	SARS-CoV-2	33	72	0	9.08237	21.3614
IFNL2	D7	SARS-CoV-2	33	72	0	8.21825	14.5643
IFNL3	D7	SARS-CoV-2	33	72	0	6.78816	17.4229
IFNB1	D7	SARS-CoV-2	33	96	0	11.5955	23.1601
IFNL1	D7	SARS-CoV-2	33	96	0	13.7636	25.2239
IFNL2	D7	SARS-CoV-2	33	96	0	11.0906	18.733
IFNL3	D7	SARS-CoV-2	33	96	0	7.80563	10.3131
IFNB1	D7	SARS-CoV-2	37	24	0	0.344432	0.43151
IFNL1	D7	SARS-CoV-2	37	24	0	0.123584	0.326973
IFNL2	D7	SARS-CoV-2	37	24	0	0.1038	0.274628
IFNL3	D7	SARS-CoV-2	37	24	0	0.126317	0.334202
IFNB1	D7	SARS-CoV-2	37	48	0	0.393398	0.498614
IFNL1	D7	SARS-CoV-2	37	48	0	1.95305	4.42278
IFNL2	D7	SARS-CoV-2	37	48	0	1.49072	3.2192
IFNL3	D7	SARS-CoV-2	37	48	0	3.11344	5.34657
IFNB1	D7	SARS-CoV-2	37	72	0	1.36977	2.10937
IFNL1	D7	SARS-CoV-2	37	72	1.10291	4.25963	5.80022
IFNL2	D7	SARS-CoV-2	37	72	0	3.48855	4.90683
IFNL3	D7	SARS-CoV-2	37	72	0	2.32762	3.81259
IFNB1	D7	SARS-CoV-2	37	96	0	0.39979	0.68407
IFNL1	D7	SARS-CoV-2	37	96	0	20.3454	47.776
IFNL2	D7	SARS-CoV-2	37	96	0	11.1966	22.9844
IFNL3	D7	SARS-CoV-2	37	96	0	6.27632	16.315
